# Supplementary material for: Machine learning algorithm-based biomarker exploration and validation of mitochondria-related diagnostic genes in osteoarthritis
Source: PeerJ journal article supplement (doi:10.7717/peerj.17963), 2024-09-10

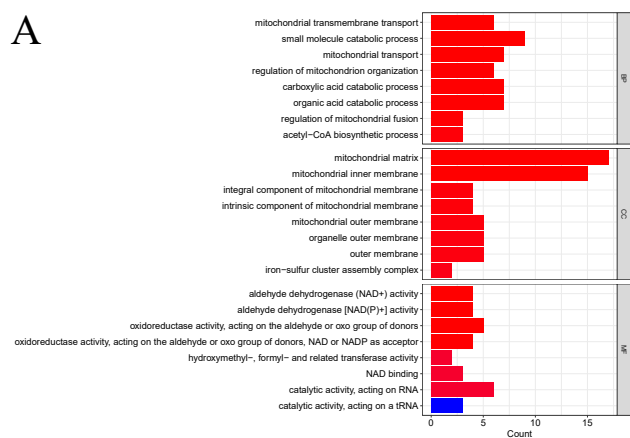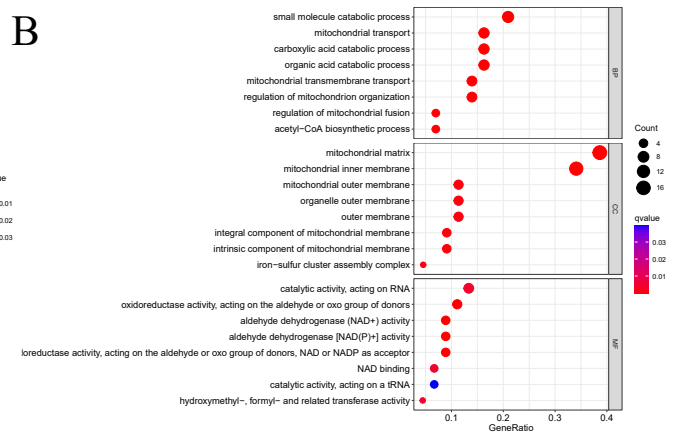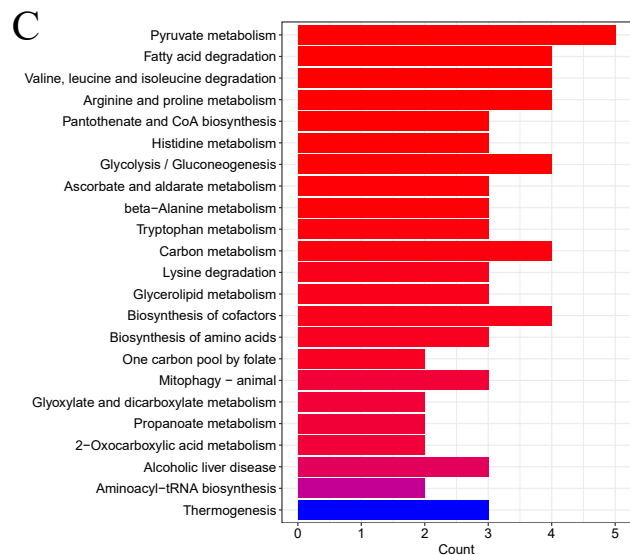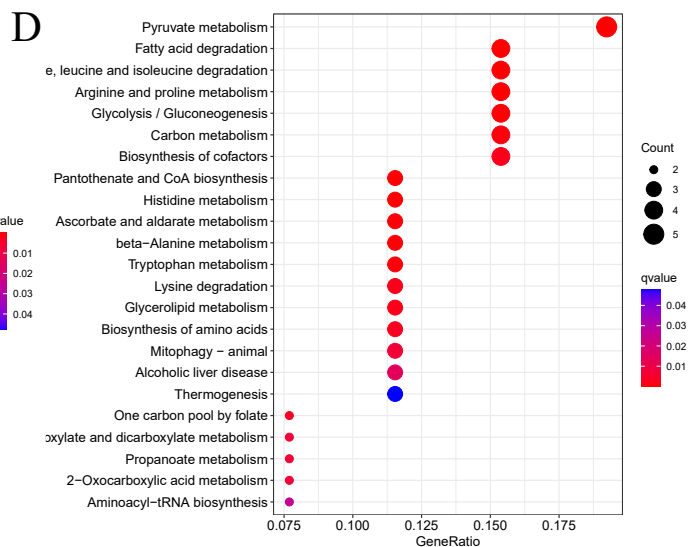

Supplement: FigS1.pdf [file FigS1.pdf]
