# Supplementary material for: Machine learning algorithm-based biomarker exploration and validation of mitochondria-related diagnostic genes in osteoarthritis
Source: PeerJ. 2024 Sep 10;12:e17963. doi: 10.7717/peerj.17963 (PMC11397131; doi:10.7717/peerj.17963)
Supplement: Supplemental Information 1 [file peerj-12-17963-s001.xlsx]

## Sheet: MRGs
CYC1
SDHB
COQ7
SDHA
UQCRC1
COQ5
PDHA1
COQ9
MRPL12
ATP5F1D
COX5A
ISCA2
PMPCB
UQCRFS1
ATP5F1A
OGDH
PDHB
UQCRC2
SDHD
MRPS35
UQCRQ
MRPL53
DBT
PDK4
MDH2
MRPS27
CS
GRPEL1
DLAT
LRPPRC
DLST
PDHX
GFM1
MPC2
NDUFS1
MRPL46
ATP5F1E
SLC25A3
MRPS23
FH
PMPCA
ATP5F1B
SDHAF4
UQCR10
ISCA1
SUCLA2
COQ3
IARS2
MRPS15
IDH3A
COX11
ETFDH
TIMM10
MRPL34
MRPL2
BCKDHA
UQCRH
HIGD2A
ATP5PO
ECHS1
LETMD1
COX6A1
COX15
AFG3L2
HADHA
ETFA
NDUFS7
CPT2
BCKDHB
IDH3B
LARS2
ACADS
LETM1
ATP5ME
OPA1
AUH
SUCLG1
NDUFV2
COQ6
MRPL43
ABHD11
ATP5PF
NDUFB8
LONP1
DLD
AIFM1
ECHDC3
APOOL
MRPL10
MRRF
NDUFS8
ACADM
IMMT
TIMM9
SLC25A4
SAMM50
NDUFS2
NDUFV1
ACO2
SUPV3L1
FECH
MTIF2
PHB
HIBCH
MRPS2
HSPA9
SURF1
PRDX3
GHITM
GUF1
TIMM13
LYRM4
MRPL16
MRPL40
IDH3G
SDHC
NDUFB5
SDHAF2
COQ10A
GATD3A
TXN2
MRPS18A
COX6C
NDUFB9
MTCH2
NDUFA6
SLC25A20
MRPL1
TIMM44
COX17
MICOS10
SOD2
COX6B1
VDAC1
CLPP
HADH
ACADL
ACAT1
MALSU1
CLPX
NDUFS4
MRPL4
C1QBP
PITRM1
UQCC1
MRPL55
MRM1
MECR
MRPL44
HSDL2
MRPS14
ABCB8
ATPAF2
NDUFA9
COA6
POLRMT
ISCU
RTN4IP1
OGDHL
ATP5F1C
BCKDK
GFM2
NDUFAF4
SLC25A35
SLC25A11
TIMM8B
MCAT
IBA57
PHB2
DAP3
CMC2
SDHAF1
MRPS17
ADHFE1
NFS1
NDUFAF5
MRPL17
TACO1
MFN1
PPTC7
MRPL11
COX4I1
NDUFS6
MRPL13
OXCT1
COX5B
PDK2
ALAS1
MRPL33
MTO1
LIAS
NDUFA5
NDUFB6
MTX2
SUCLG2
FDX1
SLC25A1
MRPS28
TIMM50
VDAC2
SLC25A42
TOMM7
ECH1
GATB
BCS1L
ERAL1
CMC1
MRPL28
TSFM
FXN
NFU1
YARS2
MRPL21
ALDH4A1
TOMM40L
NDUFAF1
NDUFB10
ACADSB
MRPS9
COQ8A
ACADVL
COQ4
MRPL15
NDUFA2
MRPL24
HSPD1
NDUFS5
AK3
CYCS
MIPEP
LYRM7
CRAT
PCCB
MRPS7
MRPL3
PRODH
PCCA
MCCC1
MRPS12
CLPB
PDK1
MRPL49
COX7A2
TMEM126A
ECHDC2
HCCS
HIBADH
MRPL19
MRPL36
SLC25A30
BDH1
FARS2
ABCB7
MTX1
NDUFA7
TIMM17A
ALDH9A1
MRPS18C
MARS2
ALDH6A1
FDXR
GATC
TRAP1
ACAD8
ALDH2
PPIF
TIMM22
IVD
L2HGDH
ETHE1
MRPL20
SLC25A5
SLC25A12
MRPS21
TOMM22
ACAA2
MRPL30
DNAJA3
NDUFB2
MRPS34
ETFB
AFG1L
ATP5IF1
ATP5PB
COX7C
CHCHD3
COQ10B
ACSF3
POLDIP2
SLC25A10
SLC25A13
PDK3
ME3
MRPL22
IDH2
GCDH
MRPL47
PPA2
MRPL9
CHCHD10
WARS2
SLC25A19
CBR4
SMDT1
HAGH
COX7A1
MTG1
COX14
NDUFA12
MRPS16
MTERF2
ETFRF1
GPD2
NDUFA10
NDUFC2
SLIRP
MT-ATP6
MT-CO2
TIMM21
NDUFA8
GLS
NDUFB11
DHTKD1
FAHD2A
HSD17B8
HINT2
MRPS5
C6orf136
SPRYD4
LIPT2
DECR1
MRPS26
SLC25A15
NDUFV3
BPHL
STOML2
MSRB2
LACTB
TOMM40
SLC25A25
ADCK5
ACAD10
VWA8
CCDC90B
DNAJC11
ALKBH7
GLDC
MPC1L
THEM4
SSBP1
MRPL27
HSCB
MRPS10
AK4
ATAD3A
MRPL37
PTGES2
TXNRD2
ACSM5
CISD1
MRPL41
MTARC2
MRPS6
MRPL23
SQOR
SCO1
GCAT
MTHFD1L
ECI2
UQCRB
ATP5PD
ATP5MG
CCDC58
MCCC2
MCEE
MOCS1
MMUT
SLC25A51
SPG7
ATP5MC3
ATAD1
OXNAD1
MTG2
DARS2
MRPL51
PC
CLYBL
PNPLA8
MLYCD
PYURF
TIMM17B
MRPL32
SLC25A26
PRODH2
NIT2
FDX2
ME2
TUFM
COX6A2
SLC30A9
TAMM41
TIMM23
RMND1
MFN2
DNLZ
CHCHD4
NDUFAB1
ACSM1
COA5
COQ2
PDSS2
EHHADH
NDUFS3
ABCB10
CKMT2
MRPS25
ACAD9
COX16
FAM210A
ACOT13
CPT1A
DHRS4
PRELID2
CARS2
NIPSNAP2
NDUFB7
MICOS13
GLRX2
MRPS30
SCO2
HSD17B10
NARS2
RPUSD3
SUOX
SARDH
RIDA
COX8A
SPR
MPV17
ZADH2
MRPL18
ALDH1B1
CHCHD1
TIMM8A
VDAC3
SLC25A24
MPC1
SLC25A22
SLC25A31
SLC25A18
TRNT1
IDE
GSTK1
VARS2
HSPE1
MRPL54
MRPL38
MRPL58
MTCH1
TRIAP1
PTCD3
COX10
AKAP1
MRM3
AK2
TMEM70
NOA1
MCUR1
TMEM14C
NDUFC1
MRPL35
NDUFA3
PDSS1
SLC25A16
FMC1
ACSM3
NDUFAF6
UCP1
SFXN1
GLRX5
PTRH1
MRPS11
XPNPEP3
PDP1
ECI1
SLC25A21
SLC25A29
SLC25A45
SDHAF3
PRELID3B
SLC25A39
NDUFB3
REXO2
GATM
TIMM10B
SARS2
CHDH
MRPL57
C8orf82
EARS2
GRHPR
MTFMT
PTCD2
ECHDC1
HARS2
NDUFA4
NDUFA13
NAXE
TMEM11
SELENOO
NAGS
HSD17B4
NDUFAF7
OAT
MRPL50
COX7B
RARS2
OXLD1
LACTB2
NDUFA11
AURKAIP1
CHCHD7
SHMT2
MTHFD2
RMDN1
CPS1
MRPL14
MTRES1
RDH13
TRMT2B
MRPS24
COA3
GSR
ENDOG
BCAT2
TEFM
ACSF2
TRMU
MRPS22
LAP3
GLUD1
HMGCL
FHIT
MRPS33
NUBPL
LYRM2
MPV17L
GADD45GIP1
TFAM
ALDH18A1
OXSM
KYAT3
TARS2
TBRG4
TMEM65
ROMO1
PRDX5
DNAJC15
MAIP1
HIGD1A
C16orf91
RHOT2
SLC25A44
HAO2
OXA1L
SLC25A46
RDH14
ATP5MPL
CA5B
COASY
CISD3
GSTZ1
COX6B2
GLOD4
ACAA1
CROT
PDF
COX19
AMT
PDPR
NLN
BOLA1
ALAS2
GRPEL2
ALDH7A1
HDHD5
GFER
IMMP2L
COX4I2
MRPL39
AADAT
FUNDC2
LYPLA1
PDHA2
MTRF1L
GTPBP3
MTHFD2L
YME1L1
ACOT2
COA8
MMAB
PPOX
ABCD3
SIRT3
LDHD
MRPL45
C12orf65
IMMP1L
POLG
ATPAF1
BLOC1S1
ALDH1L2
COX18
CPOX
NNT
NDUFAF8
ATP23
DCAKD
ATP5MF
SFXN3
AASS
DIABLO
COX8C
PXMP2
AGXT2
GLS2
APOO
ACAD11
C5orf63
HOGA1
TTC19
NGRN
TCAIM
GCSH
SIRT5
GPT2
TOMM6
FAM162A
ABCB6
MACROD1
TST
MT-CO1
MTFR1L
SDR39U1
DMGDH
SLC25A14
PRELID3A
CHCHD5
TOMM70
NIT1
FAHD1
MCU
CYP27A1
MT-ND2
MT-ND4
MT-ND5
DELE1
FASTKD1
MRPS31
ALDH1L1
PTCD1
HADHB
TRIT1
CRLS1
GLYCTK
SLC25A32
AARS2
EXOG
CHCHD2
KMO
SFXN5
ELAC2
GPX1
CPT1B
FIS1
PRELID1
UCP3
SLC25A27
SLC25A40
SLC25A23
HEMK1
SLC25A36
OMA1
LETM2
DHRS1
STOM
METTL5
MSRA
NUDT8
NMNAT3
SLC25A38
MPV17L2
ACLY
ABCD2
FLAD1
LIPT1
DGLUCY
PCK2
NADK2
MPST
NUDT13
ACACA
ABAT
HMGCS2
ALDH5A1
CKMT1A
PISD
NDUFB4
UQCR11
FAM136A
TOMM5
HTRA2
NDUFA1
MT-CYB
GUK1
D2HGDH
OPA3
AKR1B10
PHYH
NDUFAF2
ECSIT
PARL
MRPL42
DNAJC4
PAM16
ALDH3A2
ACSL6
MRS2
ABHD10
HINT3
PXMP4
OSGEPL1
NUDT2
CYB5B
GRSF1
MRPS18B
DNAJC30
CAT
DGUOK
ACOT9
ACSS1
RFK
STARD7
CHPT1
MT-ATP8
TIMMDC1
SPATA19
HTATIP2
AKR7A2
DUT
MT-CO3
DHRS7B
MTRF1
TMEM143
NT5M
RHOT1
NME4
MTHFS
TIMM29
PNPO
MICU2
PCBD2
QRSL1
ADCK1
PRDX6
NIPSNAP1
GARS1
ACSM2A
SLC25A33
LYRM9
RAB24
PARS2
MRPL52
PUS1
GOT2
NAXD
MT-ND3
ACCS
PTRH2
PGS1
OXR1
LYPLAL1
DNAJC28
FPGS
TMEM205
SLC25A53
AIFM3
MGST1
MTFP1
COA4
NIF3L1
PUSL1
SDSL
BAX
MAVS
METTL17
ACACB
ARG2
MTPAP
CCDC51
SUGCT
DNM1L
NRDC
TMEM126B
NSUN4
ACSS3
FAM210B
RBFA
METAP1D
AHCYL1
NIPSNAP3A
MTARC1
FUNDC1
ACSL1
COX20
HSDL1
CBR3
MTERF4
NUDT19
HEBP1
PTPMT1
PGAM5
DTYMK
KARS1
STAR
DNAJC19
OTC
COX7A2L
MTERF3
SFXN2
FASN
PINK1
TMEM177
TXNRD1
THNSL1
FDPS
IDI1
TOP3A
FTMT
LDHAL6B
MTFR1
BCL2L13
TRMT10C
ACOT7
TFB1M
ARF5
MCUB
TWNK
MMADHC
PYCR2
TSTD1
LYRM1
OSBPL1A
RECQL4
PET100
GDAP1
MTIF3
UNG
GLYAT
ISOC2
ATP5MC1
QDPR
COQ8B
GTPBP10
TSPO
FTH1
TRMT1
ADCK2
TSTD3
MRPS36
PDP2
AGPAT5
MCRIP2
UCP2
SLC25A37
SLC25A28
SLC25A48
SLC25A43
SLC25A47
SLC25A41
SLC25A34
EPHX2
NUDT5
MICU1
SOD1
SERHL2
NDUFAF3
BOLA3
OCIAD2
RSAD1
CHCHD6
FASTKD2
PEX11B
TMEM186
PIF1
FABP1
ABCD1
PLPBP
DBI
PNPT1
TOP1MT
RNASEH1
ABCA9
SCP2
NT5DC3
CMC4
LDHB
YBEY
HINT1
MUL1
TK2
AGMAT
CMPK2
BID
ARL2
SYNJ2BP
MFF
DCXR
NUDT9
AMACR
VPS13D
NUDT6
DMAC2
MRM2
BAK1
DHODH
MAOB
MGST3
ACP6
MRPL48
AGXT
CYB5R3
DDX28
PNKD
MICU3
BNIP3
MTX3
MUTYH
GTPBP6
CYP11A1
OCIAD1
METTL8
SMIM20
RPUSD4
SMIM8
NME6
FKBP8
ACSM4
NLRX1
FOXRED1
TFB2M
PPM1K
ATP5MC2
MT-ND1
TAZ
MSRB3
ACOT11
NIPSNAP3B
NTHL1
MARCHF5
SFXN4
TRMT5
SLC25A6
SLC25A52
OGG1
ACOD1
QTRT1
AIFM2
PRDX2
FBXL4
GPAM
DMAC2L
RMDN3
PRXL2A
ATP5MD
PET117
MAOA
C15orf61
POLQ
BCO2
IFI27
CRYZ
PYCR1
TMLHE
TOMM20
YRDC
COA7
DHRS2
MMAA
MIEF1
C15orf48
LIG3
BNIP3L
FASTKD5
PARK7
COA1
COX7B2
MT-ND4L
SIRT4
UQCC2
USP30
PDE12
NME3
DHX30
FASTK
METTL15
CYP24A1
NOCT
PANK2
CA5A
NT5DC2
ATAD3B
TRUB2
PRKACA
COMTD1
CPT1C
C3orf33
MIGA2
SND1
GLUD2
HPDL
ANGEL2
ANTKMT
UQCC3
PRDX4
CDK5RAP1
PAICS
MGARP
HDHD3
CYP11B2
AGPAT4
RCC1L
FAM185A
PMAIP1
TDRKH
SLC8B1
CYP27B1
POLG2
THEM5
BIK
MTERF1
MTFR2
GPX4
TOMM20L
COMT
MYG1
SPATA20
OXCT2
CCDC127
CRY1
ACSM2B
MYO19
MGME1
SEPTIN4
EFHD1
RAB5IF
APEX1
SPTLC2
DMAC1
ATPSCKMT
NEU4
CASP9
AGK
MCL1
DUS2
PLD6
TOMM34
PRORP
PLSCR3
CKMT1B
NDUFB1
ATP5MF-PTCD1
CASP8
BCL2L1
EXD2
ARMC10
MIEF2
THG1L
GOLPH3
PREPL
FASTKD3
CEP89
GPAT2
NBR1
BOK
FKBP10
SETD9
CYP11B1
CSKMT
MIGA1
RPIA
BBC3
BAD
BCL2
BCL2A1
BCL2L2
CASP3
DMPK
DNA2
MT-ND6
PRKN
ALKBH1
PICK1
BCL2L10
AKAP10
STYXL1
NSUN2
ADCY10
SPHK2
NSUN3
PABPC5
PRSS35
PRIMPOL
SERAC1
STX17
TRMT61B
PDE2A
PLGRKT
ETFBKMT
RTL10
BCL2L11
SPIRE1
C2orf69
ARMCX2
ARMCX1
POLB
SNAP29
ARMCX3
ARMCX6
METTL4
SPHKAP
NAT8L
MCCD1
PIGBOS1
HTD2
RP11_469A15.2

## Sheet: DEGs
id	logFC	AveExpr	t	P.Value	adj.P.Val	B
DDIT3	-2.71335	4.71316	-16.723	1.84278e-19	2.53973e-15	33.4955
MAFF	-3.12759	4.80867	-16.2583	4.86389e-19	3.3517e-15	32.6068
KLF10	-2.35072	6.74242	-12.9349	9.67838e-16	4.44625e-12	25.5179
CFI	3.60353	3.19644	12.3667	4.02499e-15	1.12539e-11	24.1655
ETS2	-2.14338	6.97048	-12.361	4.08283e-15	1.12539e-11	24.1519
PFKFB3	-2.36141	9.00549	-11.8209	1.64249e-14	3.7728e-11	22.8253
ADM	-4.57532	6.42557	-11.5341	3.49242e-14	6.87608e-11	22.1042
DHRS13	-2.55095	2.99858	-11.3598	5.55057e-14	9.56225e-11	21.6607
HILPDA	-3.76969	6.96451	-11.1968	8.59274e-14	1.31584e-10	21.2418
SESN2	-2.87747	3.69176	-11.065	1.22645e-13	1.6903e-10	20.9005
ZNF395	-2.05455	7.82994	-10.8834	2.00986e-13	2.36271e-10	20.4261
CISH	-3.15122	3.88282	-10.8749	2.05721e-13	2.36271e-10	20.4038
GADD45B	-2.92572	7.04016	-10.5506	5.02516e-13	5.32745e-10	19.5447
SLC2A1	-2.28957	7.00431	-10.5237	5.41498e-13	5.33066e-10	19.4727
PIM2	-2.239	2.9658	-10.4286	7.05681e-13	6.4838e-10	19.2176
SPOCK1	3.35151	4.8341	10.403	7.58012e-13	6.52933e-10	19.1487
LOC143666	-3.19278	3.29547	-10.3099	9.8382e-13	7.97589e-10	18.8974
DDIT4	-4.0638	8.68172	-10.2418	1.1914e-12	9.12214e-10	18.7128
JMJD6	-1.41288	5.54627	-10.2057	1.31913e-12	9.56857e-10	18.6145
MTFP1	-2.50129	2.71167	-10.1271	1.64704e-12	1.13497e-09	18.4003
ING1	-1.76724	5.62401	-9.97151	2.56204e-12	1.61094e-09	17.9737
JUN	-3.06234	6.81956	-9.97022	2.57152e-12	1.61094e-09	17.9701
ERRFI1	-2.51835	9.21021	-9.90896	3.06291e-12	1.83535e-09	17.8012
IRS2	-2.04422	5.0672	-9.87963	3.33091e-12	1.91277e-09	17.7201
TUBB4B	-2.0099	6.10532	-9.77152	4.54235e-12	2.50411e-09	17.4203
GPT2	-1.89645	5.59967	-9.75317	4.78858e-12	2.53831e-09	17.3692
TYMP	2.28964	3.03039	9.66101	6.24674e-12	3.18861e-09	17.1121
DHRS3	-1.97731	6.73232	-9.59455	7.57175e-12	3.72692e-09	16.926
MYO7A	-2.87441	3.0608	-9.54968	8.62478e-12	4.09885e-09	16.7999
FEM1C	-1.1122	6.06591	-9.47637	1.06749e-11	4.90407e-09	16.5935
IER2	-2.58188	5.64337	-9.46126	1.11555e-11	4.95953e-09	16.5508
TNFSF15	5.46193	0.245176	9.3146	1.7131e-11	7.37812e-09	16.1353
HK2	-2.65243	6.44617	-9.21515	2.29502e-11	9.58482e-09	15.8519
PIM3	-1.87966	6.25354	-9.14031	2.8622e-11	1.1602e-08	15.6377
BHLHE40	-2.39633	9.21212	-9.03407	3.9209e-11	1.54394e-08	15.3325
IRF2BP2	-1.26539	7.4201	-9.01474	4.15254e-11	1.56904e-08	15.2768
TOB1	-2.82537	6.20951	-9.00993	4.21235e-11	1.56904e-08	15.2629
FAM84B	-1.97758	3.11052	-8.9953	4.39956e-11	1.59565e-08	15.2207
KBTBD11	-1.77505	4.9752	-8.9835	4.55677e-11	1.61029e-08	15.1866
CCNJ	1.35742	2.75452	8.90564	5.74661e-11	1.98e-08	14.9615
CHPF2	1.56303	5.84006	8.8115	7.61497e-11	2.55775e-08	14.6882
CDKN1A	-2.99883	5.15998	-8.80372	7.79463e-11	2.55775e-08	14.6655
SKP2	1.41056	3.11261	8.78475	8.25062e-11	2.64442e-08	14.6103
RNF39	-2.10144	1.38498	-8.6625	1.19151e-10	3.73215e-08	14.2534
BCOR	-1.74065	6.32127	-8.65344	1.22448e-10	3.75018e-08	14.2269
GRIA2	4.92398	1.58334	8.64101	1.27126e-10	3.75092e-08	14.1904
SULF1	2.23273	6.67145	8.63895	1.27916e-10	3.75092e-08	14.1844
SNAPC1	-1.36812	5.97191	-8.58457	1.50741e-10	4.2419e-08	14.0249
THBS2	2.50244	6.27823	8.5803	1.527e-10	4.2419e-08	14.0123
ELMSAN1	-1.68289	6.38952	-8.57773	1.53893e-10	4.2419e-08	14.0048
SH3KBP1	1.44947	4.2627	8.56745	1.58752e-10	4.29003e-08	13.9746
ST6GALNAC5	5.15095	1.26765	8.55025	1.67231e-10	4.43226e-08	13.924
SIAH2	-1.04548	4.82397	-8.5323	1.7657e-10	4.50363e-08	13.8712
AKAP12	-1.82495	4.14036	-8.53181	1.76831e-10	4.50363e-08	13.8697
VEGFA	-2.56398	9.34813	-8.52645	1.79727e-10	4.50363e-08	13.854
EPDR1	2.69416	2.00834	8.50641	1.90982e-10	4.70019e-08	13.7949
PPP1R15A	-2.20367	5.44673	-8.49834	1.95707e-10	4.732e-08	13.7712
MXI1	-1.89504	6.75963	-8.46975	2.13442e-10	5.07181e-08	13.6868
C14orf119	1.41682	3.64458	8.45913	2.20438e-10	5.14927e-08	13.6555
NXT1	-1.37986	3.76125	-8.41225	2.54195e-10	5.83887e-08	13.517
HMGB2	-1.80599	5.67993	-8.39702	2.66258e-10	6.01568e-08	13.4719
PREX2	3.08132	2.98405	8.36771	2.91121e-10	6.47134e-08	13.3851
CTH	-2.06288	3.84402	-8.34019	3.16593e-10	6.92586e-08	13.3035
ATF3	-3.93768	2.79887	-8.32247	3.34188e-10	7.19652e-08	13.2509
ASPM	4.38765	0.830493	8.30554	3.51912e-10	7.46161e-08	13.2006
GRPEL1	-1.33882	4.9152	-8.29969	3.58263e-10	7.48119e-08	13.1832
BICD2	1.14456	4.70856	8.28529	3.74375e-10	7.70096e-08	13.1405
CCNL1	-1.86219	7.13914	-8.27657	3.84485e-10	7.79261e-08	13.1145
CEP95	-1.46012	5.85044	-8.24145	4.28099e-10	8.55082e-08	13.01
SLC38A3	-2.60054	5.81208	-8.23136	4.41523e-10	8.65466e-08	12.98
CDKN1B	-1.29779	6.32316	-8.22817	4.45857e-10	8.65466e-08	12.9705
HTRA1	2.78974	10.2146	8.21609	4.62672e-10	8.8563e-08	12.9345
POSTN	6.9191	3.85744	8.21028	4.70984e-10	8.89193e-08	12.9172
COL1A1	5.1696	7.15501	8.19726	4.90154e-10	9.12879e-08	12.8783
SLC6A8	-1.79301	5.41608	-8.15196	5.63254e-10	1.02313e-07	12.7431
LRRC15	4.88609	2.54068	8.15141	5.64198e-10	1.02313e-07	12.7415
PMS2CL	-1.13004	3.00858	-8.1215	6.18506e-10	1.10704e-07	12.652
KLF4	-1.59574	7.3918	-8.04072	7.93107e-10	1.40136e-07	12.4101
C19orf35	-3.10958	1.2647	-8.02027	8.44738e-10	1.47369e-07	12.3487
ITPRIP	-2.45736	5.78051	-7.99039	9.26349e-10	1.59587e-07	12.2589
SOX9	-2.07239	8.75613	-7.97815	9.62035e-10	1.63689e-07	12.2221
HERPUD1	-1.51457	7.63808	-7.91484	1.17005e-09	1.96654e-07	12.0316
UBC	-1.61636	9.92425	-7.90634	1.20127e-09	1.99469e-07	12.0059
SMIM13	1.63535	2.4873	7.90243	1.21588e-09	1.99492e-07	11.9942
PELO	-1.21273	5.76739	-7.87489	1.32418e-09	2.14705e-07	11.9111
OPTC	-2.6712	1.72932	-7.85671	1.40097e-09	2.24513e-07	11.8562
FAM210A	-1.45608	5.03558	-7.82262	1.55726e-09	2.46692e-07	11.7532
CCNG2	-1.42937	5.99301	-7.81609	1.58916e-09	2.48885e-07	11.7335
NCK1	-1.19653	5.05915	-7.81027	1.61814e-09	2.50576e-07	11.7159
C10orf10	-2.3601	8.0478	-7.77472	1.8072e-09	2.76742e-07	11.6083
THY1	4.48094	3.68317	7.74929	1.95592e-09	2.96226e-07	11.5313
KLF11	-1.2684	4.09939	-7.70048	2.27703e-09	3.41109e-07	11.3832
EGLN3	-1.81312	5.82203	-7.69298	2.33089e-09	3.45423e-07	11.3605
LOC399715	-2.46261	3.54918	-7.68675	2.37656e-09	3.48444e-07	11.3416
NACC1	1.17149	2.80207	7.67956	2.43048e-09	3.52598e-07	11.3197
JUNB	-1.79487	8.33867	-7.67614	2.45651e-09	3.52663e-07	11.3093
SNHG15	-1.04806	2.73785	-7.64219	2.73103e-09	3.88031e-07	11.2062
SAP30	-1.66209	5.01279	-7.61696	2.9549e-09	4.08893e-07	11.1294
GALNT7	1.34459	4.70623	7.61625	2.96146e-09	4.08893e-07	11.1273
P4HA3	2.1662	4.39711	7.61567	2.96686e-09	4.08893e-07	11.1255
LONRF3	-2.71032	2.6481	-7.59382	3.1765e-09	4.33451e-07	11.059
MXD1	-1.05516	4.83596	-7.59044	3.21022e-09	4.33758e-07	11.0487
CEBPG	-1.5298	5.07392	-7.57996	3.31721e-09	4.43861e-07	11.0168
FAM166A	-3.67316	0.634378	-7.57518	3.36711e-09	4.46207e-07	11.0022
RRAGD	-1.3791	4.91722	-7.54098	3.74746e-09	4.87241e-07	10.898
AVPI1	-2.04041	4.69308	-7.53435	3.82616e-09	4.92823e-07	10.8777
HERC5	-2.45882	3.12287	-7.51412	4.07645e-09	5.18683e-07	10.816
BEND5	-1.79742	1.89011	-7.51211	4.10219e-09	5.18683e-07	10.8099
LOC100507217	-1.30134	6.32475	-7.501	4.24758e-09	5.32183e-07	10.7759
KDELC1	1.55696	2.99725	7.46263	4.79066e-09	5.94818e-07	10.6587
BNIP3L	-1.04821	8.37671	-7.45582	4.8942e-09	6.02249e-07	10.6379
STX11	-1.98386	2.63125	-7.44848	5.0083e-09	6.10836e-07	10.6154
SIK1	-3.11705	4.59119	-7.43386	5.24343e-09	6.28641e-07	10.5707
DIO2	3.2221	5.75696	7.42835	5.33503e-09	6.28641e-07	10.5539
GLRB	2.16239	2.06122	7.42743	5.3504e-09	6.28641e-07	10.5511
PDGFC	2.01109	5.17853	7.40411	5.75708e-09	6.63306e-07	10.4797
TMEM19	1.52628	4.16704	7.4031	5.77541e-09	6.63306e-07	10.4766
MYLIP	-1.41664	5.08863	-7.39505	5.92339e-09	6.74679e-07	10.4519
GDE1	1.19884	4.55383	7.37719	6.26556e-09	7.03017e-07	10.3972
TREM1	4.57269	1.61902	7.37494	6.3101e-09	7.03017e-07	10.3903
SLC47A1	-1.81677	4.80282	-7.37418	6.32521e-09	7.03017e-07	10.388
CSRNP1	-2.99988	5.16029	-7.34215	6.99584e-09	7.71333e-07	10.2898
CTSC	2.76959	4.39783	7.32802	7.31414e-09	8.00027e-07	10.2465
NEAT1	-1.40506	10.5639	-7.31856	7.53537e-09	8.17736e-07	10.2174
LYPLA1	1.12197	3.88928	7.30861	7.77535e-09	8.35564e-07	10.1869
LIPA	1.84797	3.02667	7.29223	8.18707e-09	8.67956e-07	10.1366
EXTL2	1.61021	4.51261	7.28514	8.37231e-09	8.80818e-07	10.1148
MKNK2	-1.89444	6.28935	-7.28184	8.45971e-09	8.83271e-07	10.1047
FAM98A	1.1116	5.10379	7.27256	8.71092e-09	9.02661e-07	10.0762
GPX8	1.26817	6.04828	7.26223	8.99953e-09	9.24024e-07	10.0444
PTPRU	-1.21234	5.67112	-7.24768	9.42227e-09	9.54836e-07	9.99967
FAP	2.48422	6.1547	7.24396	9.53357e-09	9.59063e-07	9.98823
FRMD7	2.32786	0.937743	7.22274	1.0194e-08	1.01807e-06	9.92296
KLF9	-1.85405	7.53106	-7.21447	1.04636e-08	1.02257e-06	9.89752
ST3GAL5	-1.76838	2.4886	-7.21365	1.04906e-08	1.02257e-06	9.89501
H1FX	-1.71714	5.84939	-7.21347	1.04965e-08	1.02257e-06	9.89446
CECR5	-1.19219	3.31155	-7.21229	1.05358e-08	1.02257e-06	9.89082
ELF3	-3.02256	1.91657	-7.20462	1.07942e-08	1.04032e-06	9.86721
MEX3D	2.84313	1.25257	7.1996	1.09667e-08	1.0496e-06	9.85176
SASH1	-1.36919	7.03997	-7.14557	1.30092e-08	1.23651e-06	9.68533
BHLHE41	-1.96538	8.25302	-7.12732	1.37824e-08	1.29217e-06	9.62907
IER5	-2.07445	5.94213	-7.11149	1.44904e-08	1.34937e-06	9.58026
PROSER2	-1.29211	3.13152	-7.09866	1.5091e-08	1.39587e-06	9.54068
FOXP2	-1.09697	4.38291	-7.09494	1.52703e-08	1.40303e-06	9.52917
N4BP2L1	-1.57036	4.2477	-7.08958	1.55314e-08	1.41758e-06	9.51265
ANGPTL4	-2.73619	7.07093	-7.08473	1.57721e-08	1.43007e-06	9.49766
TGFBI	4.01806	6.53043	7.07514	1.62586e-08	1.46455e-06	9.46806
FOXD2-AS1	-1.6025	3.15574	-7.07048	1.65004e-08	1.47668e-06	9.45367
FNBP1	-1.09686	4.70977	-7.06573	1.67506e-08	1.4894e-06	9.43901
LOC100272217	-1.84925	1.3487	-7.05891	1.71162e-08	1.51215e-06	9.41797
FOSL2	-2.2696	6.76594	-7.05011	1.76007e-08	1.53593e-06	9.39076
RORC	-1.84614	4.94181	-7.04997	1.76083e-08	1.53593e-06	9.39035
ADAMTS14	2.90216	1.15416	7.03557	1.84307e-08	1.59756e-06	9.34586
NFIL3	-2.89296	5.07878	-7.02351	1.91491e-08	1.63342e-06	9.3086
GSE1	-1.42049	5.09291	-7.02275	1.91953e-08	1.63342e-06	9.30625
SLC2A3	-1.91331	5.61534	-7.02268	1.92e-08	1.63342e-06	9.30601
ECM1	1.91399	4.00172	7.01248	1.98315e-08	1.67639e-06	9.27448
RLF	-1.10533	6.90433	-7.01062	1.99484e-08	1.67639e-06	9.26875
MPP2	-1.62149	3.91774	-7.00095	2.05699e-08	1.70298e-06	9.23885
TNFAIP6	4.56035	4.00107	6.99995	2.06354e-08	1.70298e-06	9.23575
SPSB2	-1.25315	2.15784	-6.99137	2.1205e-08	1.73956e-06	9.20922
YTHDC1	-1.13552	7.15855	-6.97496	2.23387e-08	1.82173e-06	9.15846
GPRC5A	-2.08045	5.09328	-6.96501	2.30559e-08	1.85103e-06	9.12767
KLF2	-2.38455	4.60168	-6.96445	2.3097e-08	1.85103e-06	9.12593
ZKSCAN4	1.40991	1.69849	6.96439	2.3101e-08	1.85103e-06	9.12577
LOC400940	4.13722	0.231712	6.94409	2.464e-08	1.96294e-06	9.06292
SNHG1	-1.09555	4.77395	-6.94053	2.49204e-08	1.97386e-06	9.05189
ARHGEF2	-1.23707	6.73714	-6.91406	2.71067e-08	2.13477e-06	8.96994
EFEMP1	3.09167	6.37626	6.91057	2.74098e-08	2.14637e-06	8.95911
TTC9	2.95761	2.20562	6.89209	2.90679e-08	2.26335e-06	8.90187
SPEN	-1.03314	7.77935	-6.8878	2.94673e-08	2.28156e-06	8.88857
AMTN	5.28895	1.30223	6.88017	3.01912e-08	2.32455e-06	8.86492
GADD45A	-1.92915	5.52255	-6.87006	3.11778e-08	2.38718e-06	8.83359
ISM1	1.78065	7.31605	6.86604	3.15795e-08	2.40458e-06	8.82111
CD276	1.4882	4.90535	6.85451	3.27597e-08	2.48074e-06	8.78536
ALDH1L1	-2.33947	3.79763	-6.85078	3.31504e-08	2.49661e-06	8.7738
SCN8A	2.01786	1.02273	6.83406	3.49626e-08	2.61878e-06	8.72194
ARHGDIB	1.82003	3.79868	6.83068	3.53406e-08	2.63278e-06	8.71146
KLF5	-1.80766	3.56826	-6.82179	3.63556e-08	2.69384e-06	8.68387
FUT4	1.47542	5.41434	6.81284	3.74067e-08	2.75689e-06	8.6561
BTG2	-2.44473	6.4039	-6.77823	4.17672e-08	3.06189e-06	8.54866
GTF2E1	1.33849	2.83847	6.75646	4.47678e-08	3.26336e-06	8.48105
LOC100188947	-2.32086	2.46076	-6.75491	4.4989e-08	3.26336e-06	8.47625
L3MBTL4	-2.09185	2.86614	-6.75229	4.53661e-08	3.27348e-06	8.46812
NT5E	1.65406	7.63811	6.74987	4.57176e-08	3.28167e-06	8.4606
DNM3OS	1.23577	6.1292	6.74617	4.62601e-08	3.3034e-06	8.4491
PRSS23	3.00127	4.15296	6.73248	4.83251e-08	3.43307e-06	8.40655
SHC4	3.17353	3.30996	6.70594	5.25942e-08	3.69121e-06	8.32407
COL1A2	3.44192	10.0027	6.70494	5.27622e-08	3.69121e-06	8.32096
PDK1	-1.60265	7.23837	-6.70332	5.3035e-08	3.69155e-06	8.31593
FHDC1	-1.6931	4.01601	-6.69743	5.40409e-08	3.74267e-06	8.29763
HIP1R	-1.55812	4.27901	-6.6956	5.43575e-08	3.74577e-06	8.29194
C7orf73	1.466	5.34595	6.69036	5.5275e-08	3.77489e-06	8.27563
IL27RA	1.82022	1.17174	6.68864	5.55785e-08	3.77489e-06	8.27029
RELT	-1.831	3.5814	-6.68851	5.56017e-08	3.77489e-06	8.26988
KIAA1683	-2.48983	3.43701	-6.68272	5.66393e-08	3.82648e-06	8.25187
MKI67	4.36243	0.7405	6.67439	5.81644e-08	3.91035e-06	8.22598
STC2	-2.65567	8.56785	-6.66899	5.91759e-08	3.95904e-06	8.20918
RASSF7	-1.94566	2.61824	-6.65791	6.13061e-08	4.08174e-06	8.17473
HMGA2	3.1626	0.197863	6.65545	6.17898e-08	4.09417e-06	8.16707
ADO	1.05881	4.02025	6.64586	6.37106e-08	4.19261e-06	8.13724
DMBT1	3.29347	0.112572	6.64204	6.44924e-08	4.19261e-06	8.12536
GBP2	-1.29167	7.12006	-6.64056	6.47993e-08	4.19279e-06	8.12074
ISM1-AS1	2.65331	3.37305	6.63793	6.53445e-08	4.20831e-06	8.11257
HES1	-2.32808	6.41014	-6.62776	6.75037e-08	4.31685e-06	8.0809
GM2A	1.00766	4.50415	6.62636	6.78055e-08	4.31685e-06	8.07655
MLXIP	-1.45913	5.03026	-6.6256	6.79695e-08	4.31685e-06	8.0742
SLC3A2	-1.47085	5.63543	-6.62046	6.90958e-08	4.36825e-06	8.05819
NOD2	-2.18967	1.80356	-6.61879	6.9466e-08	4.3716e-06	8.05298
GPR124	2.0515	2.16355	6.56957	8.12973e-08	5.09291e-06	7.89976
TLE3	-1.31974	5.46787	-6.5549	8.52e-08	5.31324e-06	7.85408
BCL7A	-1.52012	2.20423	-6.5482	8.70467e-08	5.40395e-06	7.83319
SLC5A10	-1.75509	1.535	-6.53353	9.12267e-08	5.63805e-06	7.7875
TOP2A	4.28084	0.702629	6.50773	9.9074e-08	6.06862e-06	7.70711
BMP1	1.35873	5.38835	6.49078	1.04597e-07	6.25464e-06	7.65427
STAC2	-2.35642	4.2179	-6.48957	1.05001e-07	6.25464e-06	7.65052
CTIF	-1.14845	5.29539	-6.48904	1.0518e-07	6.25464e-06	7.64885
ZBTB39	1.26972	2.58518	6.48861	1.05325e-07	6.25464e-06	7.64751
CCND1	2.0349	5.6152	6.48835	1.05413e-07	6.25464e-06	7.6467
RHOB	-1.95164	7.77642	-6.4863	1.06106e-07	6.25464e-06	7.64032
ATOH8	-2.08257	5.89542	-6.48604	1.06196e-07	6.25464e-06	7.6395
RCC2	1.11421	3.9512	6.46888	1.12189e-07	6.57955e-06	7.58601
HOMER2	2.13277	1.30977	6.46641	1.13082e-07	6.60377e-06	7.5783
DNAJB9	-1.37025	6.57497	-6.46412	1.13913e-07	6.62424e-06	7.57117
RYBP	-1.2615	5.537	-6.45705	1.16518e-07	6.74727e-06	7.54914
ARHGAP44	1.66456	1.53625	6.44195	1.22289e-07	7.05181e-06	7.50206
NDRG1	-1.29939	9.02743	-6.41879	1.31705e-07	7.56128e-06	7.4298
ZSCAN9	1.14122	2.80708	6.41757	1.32221e-07	7.56128e-06	7.426
CHST6	1.66262	6.92251	6.41427	1.33625e-07	7.61002e-06	7.41571
RTN1	2.19809	0.26929	6.41055	1.35228e-07	7.66958e-06	7.4041
CLDN5	-3.12589	0.887701	-6.40743	1.36584e-07	7.71478e-06	7.39437
RARA	-2.30953	6.03142	-6.40101	1.3942e-07	7.84282e-06	7.37436
TMEM182	1.23416	1.67869	6.39311	1.42993e-07	8.01108e-06	7.34972
TXNIP	-2.32433	9.00959	-6.39131	1.43823e-07	8.02499e-06	7.34408
TSPYL2	-1.67179	7.24353	-6.38202	1.48165e-07	8.23391e-06	7.31511
IFT122	-1.12446	5.507	-6.37069	1.53642e-07	8.504e-06	7.27976
PIGA	-2.02026	4.0066	-6.3288	1.75713e-07	9.62297e-06	7.14904
PAIP2B	-1.69058	3.8783	-6.3179	1.81963e-07	9.87329e-06	7.11501
MYZAP	-2.55261	1.77344	-6.30631	1.8885e-07	1.01669e-05	7.07884
TMEM119	4.39744	0.0836674	6.29438	1.96214e-07	1.04605e-05	7.04159
IFRD1	-1.46228	5.9403	-6.29308	1.97032e-07	1.04605e-05	7.03754
IPW	1.00783	3.466	6.29259	1.9734e-07	1.04605e-05	7.03602
PLEKHG2	-1.8201	4.45528	-6.29009	1.98928e-07	1.05043e-05	7.02821
KIT	-3.34386	1.73917	-6.2877	2.00461e-07	1.05294e-05	7.02074
SPRY4	-1.69681	4.39213	-6.28697	2.00931e-07	1.05294e-05	7.01845
GLI3	1.18826	8.13262	6.26886	2.12944e-07	1.11166e-05	6.96192
KCNJ15	1.52287	2.7147	6.25631	2.21688e-07	1.14861e-05	6.92274
ITPKC	-1.95608	4.77895	-6.25501	2.2261e-07	1.14907e-05	6.91869
KCNS3	3.08656	0.0907419	6.24532	2.29636e-07	1.17625e-05	6.88844
TIPARP	-1.94284	8.10221	-6.24432	2.30381e-07	1.17625e-05	6.88529
THEMIS2	3.14635	0.610178	6.24424	2.30437e-07	1.17625e-05	6.88505
ULK1	-1.44713	4.53207	-6.23955	2.33928e-07	1.18736e-05	6.87041
PARS2	1.69057	0.84501	6.23901	2.34336e-07	1.18736e-05	6.86872
DAPK2	-1.7772	3.23885	-6.22522	2.44934e-07	1.23651e-05	6.82565
SLC38A7	1.50695	1.48243	6.21608	2.52219e-07	1.26464e-05	6.79712
CRTAC1	1.5105	10.1695	6.2148	2.53258e-07	1.26464e-05	6.79312
KCNN4	2.95113	2.08918	6.20727	2.59444e-07	1.29085e-05	6.76962
ZNF30	1.33208	2.03043	6.2029	2.63109e-07	1.30438e-05	6.75597
ACADL	-2.42097	3.47305	-6.19974	2.65789e-07	1.31294e-05	6.7461
TLN2	-1.19931	4.31784	-6.19347	2.71188e-07	1.33483e-05	6.72653
STK32B	-1.74114	4.3111	-6.19048	2.73803e-07	1.3429e-05	6.71718
KRBA1	-1.44219	4.36907	-6.18173	2.816e-07	1.37138e-05	6.68985
ERICH1	-1.65179	5.15559	-6.18044	2.82767e-07	1.37222e-05	6.68582
ZNF516	-1.06673	5.20414	-6.17388	2.88778e-07	1.39647e-05	6.66535
FAM160A1	-1.6555	5.09645	-6.16379	2.98286e-07	1.43239e-05	6.63382
FNDC1	2.81032	5.15699	6.15697	3.0488e-07	1.45898e-05	6.61253
EVI2A	1.54075	4.37102	6.15569	3.06139e-07	1.45993e-05	6.60852
FTSJD1	1.60453	3.36773	6.14859	3.13188e-07	1.48328e-05	6.58636
TLL1	3.56057	0.587743	6.13382	3.28393e-07	1.54997e-05	6.54022
SLC37A2	-1.53544	6.20795	-6.12518	3.37618e-07	1.58807e-05	6.51326
CEBPB	-1.44847	6.72792	-6.12084	3.42356e-07	1.60488e-05	6.49969
ZKSCAN7	1.055	2.58724	6.11801	3.45482e-07	1.61405e-05	6.49085
PHF21A	-1.03368	6.24312	-6.09933	3.66823e-07	1.70221e-05	6.43251
TNC	3.72937	9.16061	6.09612	3.70629e-07	1.7141e-05	6.42247
IGFBP3	3.29034	2.78485	6.08618	3.82643e-07	1.76374e-05	6.39142
THRA	-1.37013	5.23239	-6.08335	3.86132e-07	1.77389e-05	6.38259
HLA-F	-1.07078	3.61236	-6.06926	4.03996e-07	1.84754e-05	6.33858
SOX13	-2.19913	2.22358	-6.06779	4.05909e-07	1.84754e-05	6.33398
HBB	5.29171	0.722276	6.06757	4.06186e-07	1.84754e-05	6.33332
SLC35B4	1.44534	4.54643	6.05522	4.22607e-07	1.91591e-05	6.29475
ZNF223	1.1352	2.00208	6.03346	4.53189e-07	2.04113e-05	6.22677
CHI3L2	3.66379	9.83664	6.029	4.59714e-07	2.06377e-05	6.21286
ALDH3A2	-1.14973	6.35799	-6.02309	4.68527e-07	2.08972e-05	6.19439
SOX11	3.83086	2.03918	6.02197	4.70211e-07	2.09047e-05	6.19089
STEAP1	1.37748	4.71784	6.00956	4.89326e-07	2.16291e-05	6.15212
CERK	-1.15752	6.40041	-6.00935	4.89643e-07	2.16291e-05	6.15149
CITED2	-1.72537	5.36277	-5.9889	5.22876e-07	2.28872e-05	6.08761
HLA-J	-1.43248	2.42843	-5.98876	5.23107e-07	2.28872e-05	6.08718
ASS1	-1.14017	6.58314	-5.98523	5.29069e-07	2.30748e-05	6.07615
GGA2	-1.10217	5.91215	-5.98125	5.35865e-07	2.32975e-05	6.06374
ARNTL2	1.89379	3.32285	5.97758	5.42214e-07	2.34993e-05	6.05228
RND1	-3.54	1.02525	-5.97283	5.50553e-07	2.3786e-05	6.03743
ENC1	2.31561	2.97423	5.96761	5.59857e-07	2.40756e-05	6.02113
DUSP1	-1.28627	8.79598	-5.96711	5.6075e-07	2.40756e-05	6.01958
NOVA1	1.55887	4.67299	5.96431	5.65815e-07	2.41442e-05	6.01083
OSR2	-1.51344	3.54496	-5.96015	5.73418e-07	2.41677e-05	5.99785
TMEM8A	1.22394	2.80073	5.95569	5.8169e-07	2.44416e-05	5.98391
CENPN	1.07427	2.26592	5.9545	5.83914e-07	2.44605e-05	5.9802
ANLN	3.01541	1.07731	5.94954	5.93277e-07	2.47774e-05	5.96473
RNMT	-1.33364	6.42484	-5.94767	5.9686e-07	2.48517e-05	5.95887
SLC43A2	-1.96619	2.41818	-5.94458	6.02803e-07	2.5002e-05	5.94924
VPS37B	-1.66621	4.0821	-5.94257	6.06711e-07	2.5035e-05	5.94295
ADCY7	1.42108	3.81478	5.93522	6.21187e-07	2.54797e-05	5.92002
RCBTB2	1.10891	3.54683	5.92282	6.46416e-07	2.63577e-05	5.88129
CTSO	1.25044	5.13551	5.91726	6.58055e-07	2.66962e-05	5.86394
ELL	-1.20593	3.93918	-5.91701	6.58592e-07	2.66962e-05	5.86314
AGPAT4-IT1	1.10602	2.8523	5.91499	6.6286e-07	2.67904e-05	5.85686
GLB1	1.05865	4.88361	5.91404	6.64888e-07	2.67938e-05	5.85389
AOC2	2.0925	3.49735	5.91068	6.72091e-07	2.70051e-05	5.84341
FN1	1.39623	15.967	5.90557	6.83209e-07	2.7372e-05	5.82745
SMIM3	-1.93732	5.6364	-5.90342	6.87944e-07	2.74818e-05	5.82074
ZMAT3	1.23209	4.68572	5.89648	7.03443e-07	2.79763e-05	5.79907
PCDH12	1.28332	2.60641	5.89606	7.0438e-07	2.79763e-05	5.79777
CENPF	2.64077	1.79923	5.89478	7.0729e-07	2.80111e-05	5.79377
ARNTL	-1.85856	4.12408	-5.8877	7.23552e-07	2.84914e-05	5.77166
FAM43A	-2.05858	3.74209	-5.88562	7.28396e-07	2.86004e-05	5.76517
TBC1D9	1.43618	2.79804	5.88339	7.33632e-07	2.87242e-05	5.7582
LGI2	1.99485	1.13771	5.88104	7.3919e-07	2.88598e-05	5.75087
KCTD21	1.05992	2.80443	5.86982	7.66275e-07	2.98328e-05	5.71587
MMP13	3.8009	2.51472	5.86553	7.76901e-07	3.01613e-05	5.70248
LEPROTL1	1.14693	3.90121	5.8603	7.90055e-07	3.05607e-05	5.68615
ABLIM1	-1.41615	5.35566	-5.85968	7.91625e-07	3.05607e-05	5.68422
VANGL1	1.96877	3.46566	5.85252	8.10021e-07	3.11836e-05	5.66189
RIOK3	-1.33858	6.20448	-5.8484	8.20809e-07	3.14233e-05	5.64902
TRAM1L1	1.74847	1.31065	5.8452	8.29283e-07	3.14853e-05	5.63904
COL3A1	3.05783	12.4765	5.84426	8.31796e-07	3.1494e-05	5.63609
SERPINA5	1.47753	8.3519	5.83405	8.59506e-07	3.23329e-05	5.60423
BNIP3	-1.83705	7.60376	-5.83351	8.60991e-07	3.23329e-05	5.60255
PENK	4.58695	1.13131	5.83054	8.69235e-07	3.25029e-05	5.59329
TTC21A	-1.22771	3.54291	-5.83018	8.70235e-07	3.25029e-05	5.59217
SPRY1	-1.64706	2.75759	-5.82738	8.7809e-07	3.26978e-05	5.58344
RAB20	-1.70793	2.88077	-5.82663	8.80196e-07	3.26978e-05	5.58111
CD55	1.6804	7.28195	5.82527	8.84062e-07	3.27531e-05	5.57685
THBS3	1.34552	6.88991	5.82206	8.93203e-07	3.3003e-05	5.56684
SCML1	-1.10714	4.31844	-5.82118	8.95728e-07	3.30078e-05	5.5641
GYS1	-1.54375	4.78727	-5.81919	9.01476e-07	3.31311e-05	5.55788
SPAG17	1.12264	4.31965	5.8162	9.10168e-07	3.32731e-05	5.54855
OLFML2B	2.05996	3.33116	5.81289	9.19891e-07	3.35395e-05	5.53822
ENO4	1.51487	0.623938	5.80931	9.30523e-07	3.38376e-05	5.52705
RIPK3	1.51872	1.26138	5.77495	1.03895e-06	3.76809e-05	5.41991
P2RY6	2.06942	2.39494	5.77323	1.04472e-06	3.77909e-05	5.41453
WDR5B	-1.24302	5.25884	-5.76868	1.06007e-06	3.82434e-05	5.40035
PLEKHG1	1.88758	2.41051	5.76788	1.06278e-06	3.82434e-05	5.39787
PCDH17	-3.05235	0.707519	-5.76617	1.06863e-06	3.82973e-05	5.39253
WWP2	-1.29611	10.2778	-5.76582	1.06984e-06	3.82973e-05	5.39144
EEPD1	-1.49828	2.80345	-5.73869	1.16713e-06	4.16249e-05	5.30684
ICMT	1.2487	5.2057	5.73823	1.16883e-06	4.16249e-05	5.30542
MYO15A	-1.19871	3.7471	-5.7321	1.19205e-06	4.2241e-05	5.2863
SHMT2	-1.13509	6.92969	-5.72866	1.20528e-06	4.25738e-05	5.27558
PPFIA4	-1.39959	5.97117	-5.71299	1.26738e-06	4.42204e-05	5.22676
OGN	2.46221	10.4173	5.70753	1.28977e-06	4.4888e-05	5.20974
FOSL1	-2.45631	2.01991	-5.70327	1.30752e-06	4.52771e-05	5.19646
ABRACL	1.65093	1.6683	5.70096	1.31724e-06	4.54991e-05	5.18927
PTPN22	-1.35846	5.88669	-5.69554	1.34031e-06	4.60654e-05	5.17239
C5orf4	-1.46706	6.3653	-5.68265	1.39689e-06	4.76841e-05	5.13222
LRRC66	1.64999	1.14016	5.68049	1.40661e-06	4.76841e-05	5.12549
CEP250	-1.04097	6.15494	-5.67971	1.41011e-06	4.76841e-05	5.12307
TSPAN12	1.12616	2.38152	5.67938	1.41163e-06	4.76841e-05	5.12202
JAK3	1.34393	3.8261	5.67217	1.44462e-06	4.8679e-05	5.09958
ZNF331	-1.21145	5.23528	-5.6707	1.45146e-06	4.87902e-05	5.09499
GFRA2	3.07769	3.06915	5.66343	1.48567e-06	4.97247e-05	5.07236
MIDN	-1.33466	5.36381	-5.66291	1.48815e-06	4.97247e-05	5.07074
TFCP2L1	-2.37211	2.35608	-5.66251	1.49008e-06	4.97247e-05	5.06948
LOC150622	2.41824	4.20547	5.65751	1.51412e-06	5.04049e-05	5.05393
FAM162A	-1.22985	5.72437	-5.6554	1.52439e-06	5.06246e-05	5.04736
SFRP4	3.99907	0.505846	5.64644	1.56882e-06	5.18501e-05	5.01946
GPR161	1.2819	3.70905	5.64154	1.59366e-06	5.25449e-05	5.0042
CCNA2	1.69064	1.24781	5.63652	1.61949e-06	5.32693e-05	4.98858
TSPAN11	1.58719	3.96579	5.63525	1.62612e-06	5.336e-05	4.98461
MMP19	2.75419	0.957732	5.62609	1.67458e-06	5.46534e-05	4.95609
CDC42EP4	-1.44304	5.42027	-5.62555	1.67743e-06	5.46534e-05	4.95444
CDK6	1.67593	5.18943	5.62459	1.6826e-06	5.46924e-05	4.95145
ATP8A1	-1.53699	3.84711	-5.6065	1.78302e-06	5.78202e-05	4.89515
PFKFB4	-2.43648	3.91419	-5.60461	1.79388e-06	5.79137e-05	4.88925
KCNAB1	-1.11984	6.25608	-5.60453	1.79431e-06	5.79137e-05	4.88902
ANTXR1	1.2328	7.02861	5.5988	1.82758e-06	5.87125e-05	4.87118
CYR61	2.10348	8.00938	5.59541	1.8475e-06	5.92145e-05	4.86065
B3GALT6	1.27941	3.44695	5.59245	1.86513e-06	5.93835e-05	4.85143
DOLK	1.55709	2.47287	5.59183	1.86882e-06	5.93835e-05	4.8495
COL5A1	1.74762	9.83732	5.59163	1.87001e-06	5.93835e-05	4.84889
SLC7A5	-1.77596	4.58728	-5.58725	1.89647e-06	6.00854e-05	4.83524
MICALL2	1.57855	3.12147	5.574	1.9787e-06	6.25469e-05	4.79402
RAET1E	1.71389	0.00451039	5.57263	1.98737e-06	6.26773e-05	4.78978
ANPEP	3.65535	2.41592	5.56643	2.02724e-06	6.37888e-05	4.77049
EHD3	1.15447	3.89503	5.5626	2.05224e-06	6.44282e-05	4.75859
LRRC8E	1.62943	1.40576	5.55611	2.09533e-06	6.56314e-05	4.73842
FGD5	-1.0697	5.61315	-5.5514	2.12717e-06	6.64778e-05	4.72377
NOTCH3	4.09034	1.46584	5.55001	2.13669e-06	6.66242e-05	4.71944
NOV	2.53926	1.71527	5.54848	2.14714e-06	6.66973e-05	4.7147
ZSCAN16	1.59713	0.951825	5.54826	2.14871e-06	6.66973e-05	4.71399
ALDH1B1	1.29771	2.61792	5.54594	2.16468e-06	6.7042e-05	4.7068
RASSF1	-1.0114	4.91569	-5.53999	2.20633e-06	6.80261e-05	4.6883
FOXN3	-1.10714	6.69549	-5.53718	2.2263e-06	6.84884e-05	4.67956
SPARC	2.10155	11.7011	5.53567	2.23706e-06	6.86664e-05	4.67487
ZNF85	1.08128	2.36498	5.53264	2.25886e-06	6.91813e-05	4.66546
NPAS2	-1.16264	4.51465	-5.52822	2.29104e-06	6.98813e-05	4.65173
SLC38A5	1.76364	2.18038	5.52745	2.29671e-06	6.98813e-05	4.64933
PLXNA1	1.01628	4.68718	5.52742	2.29692e-06	6.98813e-05	4.64924
OSBPL3	1.38071	3.90947	5.51943	2.35643e-06	7.15338e-05	4.62441
PLD6	-1.38769	1.79817	-5.51782	2.36864e-06	7.17465e-05	4.61939
TUBA8	-1.53792	1.73394	-5.50815	2.44307e-06	7.31965e-05	4.58936
RSG1	-1.30282	1.59291	-5.50717	2.45077e-06	7.3268e-05	4.5863
LOC283174	1.11783	3.51958	5.50593	2.46049e-06	7.33007e-05	4.58246
EZH2	1.28778	1.82059	5.50532	2.46526e-06	7.33007e-05	4.58058
SMOC2	2.14255	9.3279	5.50419	2.47422e-06	7.33007e-05	4.57706
HOXA11	-1.30849	4.70773	-5.5037	2.47808e-06	7.33007e-05	4.57555
NCAM1	2.41956	3.08373	5.50366	2.47846e-06	7.33007e-05	4.5754
RUNX1-IT1	2.98445	0.420337	5.49551	2.54389e-06	7.49453e-05	4.55011
CIT	2.32167	1.20145	5.49505	2.54769e-06	7.49453e-05	4.54866
ZNF200	1.23172	1.61743	5.49472	2.55038e-06	7.49453e-05	4.54764
VEPH1	1.66982	0.758609	5.48751	2.60988e-06	7.65305e-05	4.52525
ECT2	2.4504	1.58601	5.48398	2.6395e-06	7.72347e-05	4.5143
TGIF1	-1.19653	4.90562	-5.48269	2.65044e-06	7.73905e-05	4.51029
ZNF442	-1.31856	2.13359	-5.48163	2.65946e-06	7.74898e-05	4.50699
SBF2-AS1	-1.44962	2.35058	-5.47692	2.69982e-06	7.84997e-05	4.49237
SLC2A1-AS1	-1.64362	1.96842	-5.47557	2.71145e-06	7.86721e-05	4.4882
TAS1R1	-1.94765	1.02551	-5.46749	2.7825e-06	8.02269e-05	4.4631
CCNH	-1.00799	4.94477	-5.4596	2.85355e-06	8.17622e-05	4.43863
SLCO2A1	-2.64419	1.71099	-5.44939	2.94826e-06	8.39904e-05	4.40695
RALGDS	-1.26324	4.89168	-5.44925	2.9496e-06	8.39904e-05	4.40651
SEMA3C	2.22241	5.10625	5.44341	3.00517e-06	8.53963e-05	4.3884
LAYN	-1.19825	4.71008	-5.43147	3.1221e-06	8.83547e-05	4.35137
ICAM1	-1.32467	5.9165	-5.42948	3.14201e-06	8.87361e-05	4.3452
PPIC	1.86821	5.73781	5.42504	3.18693e-06	8.96374e-05	4.33143
KIF26A	-1.09929	3.14569	-5.4208	3.23048e-06	9.04929e-05	4.31826
MXRA5	3.24998	7.35725	5.42016	3.23708e-06	9.04936e-05	4.31628
GAB2	-1.45034	5.16794	-5.41466	3.29448e-06	9.17311e-05	4.29923
SIK2	-1.13293	6.53228	-5.40602	3.38664e-06	9.41023e-05	4.27246
PPP4R4	-1.31926	6.44889	-5.40519	3.39566e-06	9.41221e-05	4.26988
ABCC10	1.15374	3.07059	5.4047	3.40101e-06	9.41221e-05	4.26836
CASC5	3.03403	0.390918	5.3934	3.526e-06	9.71906e-05	4.23335
TPPP3	3.09049	4.20203	5.39128	3.55006e-06	9.76585e-05	4.22676
PRKAG2	-1.54193	4.84935	-5.38559	3.61513e-06	9.92503e-05	4.20914
NR1D1	-2.56901	7.56741	-5.3843	3.63004e-06	9.93937e-05	4.20515
MOAP1	-1.17744	3.51344	-5.38385	3.63531e-06	9.93937e-05	4.20374
TOB1-AS1	-1.85668	0.285894	-5.3831	3.64393e-06	9.93937e-05	4.20144
CPNE2	1.3283	3.67522	5.38215	3.65507e-06	9.93937e-05	4.19848
SLC46A3	1.36189	2.02658	5.38203	3.65641e-06	9.93937e-05	4.19813
FSTL1	1.49195	8.75459	5.37384	3.75338e-06	0.00010143	4.17274
ODF3B	2.00344	1.95131	5.37264	3.76772e-06	0.000101618	4.16904
MGEA5	-1.02653	7.8232	-5.36814	3.82227e-06	0.000102888	4.1551
GOLM1	1.15887	7.41835	5.36509	3.85975e-06	0.000103694	4.14564
ADSSL1	-1.72417	6.1956	-5.36354	3.87892e-06	0.000104006	4.14084
DENND3	-1.11168	5.24389	-5.36197	3.89842e-06	0.000104326	4.13597
IRF1	-2.14969	3.87858	-5.35952	3.92895e-06	0.000104899	4.12841
PRADC1	1.18851	2.03717	5.35904	3.93506e-06	0.000104899	4.1269
MAMDC2	1.7918	5.42213	5.35358	4.00422e-06	0.000106271	4.11001
PIEZO2	-1.8022	6.79068	-5.35315	4.00964e-06	0.000106271	4.10869
RAMP3	2.42258	2.10983	5.35036	4.04556e-06	0.00010696	4.10005
ADAMTS7	2.68166	0.637335	5.34993	4.05116e-06	0.00010696	4.09871
PNRC1	-1.70291	7.89106	-5.34494	4.11616e-06	0.000108261	4.08327
GPR68	2.61744	1.57884	5.3435	4.13517e-06	0.000108348	4.0788
HUNK	1.47548	0.887559	5.33906	4.19415e-06	0.000109258	4.06507
ZFP36	-2.31397	6.89988	-5.33892	4.19597e-06	0.000109258	4.06465
LINS	1.05461	2.63022	5.33825	4.20495e-06	0.000109258	4.06258
LOC100506801	-2.43472	0.413797	-5.33791	4.20954e-06	0.000109258	4.06152
SKA2	1.07432	3.36384	5.33568	4.23969e-06	0.000109627	4.0546
VIT	-2.28654	6.14419	-5.32608	4.37158e-06	0.000112615	4.0249
TUFT1	-1.05187	3.279	-5.32232	4.42425e-06	0.000113547	4.01329
FAM115C	-1.21426	4.96059	-5.32067	4.44765e-06	0.000113725	4.00817
COL5A2	1.99684	9.95997	5.30915	4.6142e-06	0.000117114	3.97254
PLK3	-1.49685	4.34879	-5.30772	4.63518e-06	0.00011743	3.96814
ILF3-AS1	-1.27819	5.18543	-5.30667	4.65071e-06	0.00011756	3.9649
MMD	1.39756	0.68059	5.30623	4.65735e-06	0.00011756	3.96351
TCTEX1D4	-2.57967	1.22424	-5.30484	4.678e-06	0.000117865	3.95923
FOXD2	-1.18473	5.04338	-5.29999	4.75097e-06	0.000119308	3.94422
RNF24	-1.01314	5.62693	-5.29988	4.75259e-06	0.000119308	3.94389
KCND3	-1.84982	2.06738	-5.27536	5.1391e-06	0.000127158	3.86811
SERPINE2	2.03293	7.00649	5.27192	5.19565e-06	0.000128	3.85751
FADD	1.00462	3.62936	5.2716	5.20099e-06	0.000128	3.85651
PPP1R3C	-1.79228	9.57076	-5.27068	5.21624e-06	0.00012804	3.85367
ARHGEF37	-1.63391	2.4777	-5.27038	5.22118e-06	0.00012804	3.85275
GRM6	1.92887	0.410076	5.26428	5.32374e-06	0.000130318	3.8339
MAP1B	1.75615	4.43693	5.26059	5.38666e-06	0.000131164	3.82252
HEG1	1.41628	4.5845	5.25946	5.40608e-06	0.000131405	3.81903
MATN1-AS1	-1.95966	2.04254	-5.25515	5.48092e-06	0.000132756	3.80571
CHAC1	-1.52589	1.23837	-5.25448	5.49259e-06	0.000132775	3.80365
ZBTB21	-1.16898	6.47729	-5.25298	5.51898e-06	0.000132976	3.799
CCDC80	1.61845	9.03662	5.24123	5.72942e-06	0.000137797	3.76274
LOXL1	1.51428	3.21118	5.2407	5.73903e-06	0.000137797	3.76112
BTG3	-1.11734	5.05164	-5.23697	5.80775e-06	0.000138962	3.74959
BAG3	-1.26829	6.03855	-5.2292	5.95314e-06	0.000141703	3.72563
FOSB	-3.11736	6.27163	-5.22588	6.01649e-06	0.000142964	3.71538
ABHD6	1.13494	2.26381	5.22467	6.03969e-06	0.000143269	3.71165
PER1	-1.74324	7.9465	-5.22209	6.08952e-06	0.000144202	3.70369
ARPC1B	1.0283	5.03328	5.21861	6.15742e-06	0.000145311	3.69295
CRLF1	2.08069	5.52585	5.21654	6.19802e-06	0.000146019	3.68658
RASSF5	-1.18668	3.42783	-5.20804	6.3681e-06	0.000149007	3.66036
C10orf105	1.62567	5.6899	5.20639	6.40146e-06	0.000149534	3.6553
PRH2	1.45113	2.50023	5.20461	6.43795e-06	0.000150132	3.64979
NPR3	3.37781	1.24943	5.20208	6.48998e-06	0.000150515	3.64199
SMOX	-1.33001	3.81796	-5.19755	6.58419e-06	0.000152224	3.62804
HYAL2	1.14443	3.25141	5.19709	6.59394e-06	0.000152224	3.6266
COL6A6	2.42795	0.0883591	5.19411	6.65665e-06	0.000152903	3.61744
AGPAT9	-1.20213	1.97461	-5.19281	6.68429e-06	0.000153283	3.61342
AOC3	1.73841	1.70967	5.18786	6.79041e-06	0.0001552	3.59817
AURKA	1.49934	0.157986	5.18532	6.84534e-06	0.000156196	3.59037
FLJ43663	-1.14248	6.36562	-5.18257	6.90559e-06	0.000157311	3.58188
BCR	-1.29026	4.88123	-5.18197	6.9188e-06	0.000157351	3.58003
KIF20A	2.62147	0.307191	5.18022	6.95734e-06	0.000157552	3.57465
SLC2A12	1.74484	4.14871	5.18001	6.96193e-06	0.000157552	3.57401
PPP1R14C	2.60662	3.04634	5.17534	7.06617e-06	0.000159388	3.55962
C1QTNF2	2.60971	0.976561	5.17448	7.08546e-06	0.000159472	3.55698
SLC25A20	1.2399	2.25826	5.17413	7.09348e-06	0.000159472	3.55588
LOC100506394	-1.59156	0.812542	-5.17364	7.10463e-06	0.000159472	3.55436
RGS16	-1.39264	5.68895	-5.16945	7.19979e-06	0.000161084	3.54148
SLC6A16	-2.08472	2.41805	-5.16708	7.25436e-06	0.000161779	3.53416
ASNS	-1.24845	4.17269	-5.15573	7.5207e-06	0.000167178	3.49925
H3F3B	-1.09401	9.52967	-5.15081	7.63932e-06	0.000169541	3.4841
SBDSP1	-1.37467	4.52538	-5.14879	7.6885e-06	0.000170358	3.47789
WEE1	-1.55509	3.82994	-5.14805	7.70675e-06	0.000170489	3.47559
SULT1C4	-1.84212	2.66827	-5.14471	7.78877e-06	0.000171957	3.46534
S100A4	3.01168	5.57345	5.14296	7.8323e-06	0.000171957	3.45995
ARSB	1.44913	3.76678	5.14283	7.83549e-06	0.000171957	3.45955
MLLT3	-1.06835	4.32287	-5.14079	7.88639e-06	0.000172524	3.45328
PDE3A	1.81677	1.426	5.13862	7.94115e-06	0.000173447	3.44659
KLF15	-2.20339	5.40411	-5.13754	7.96824e-06	0.000173489	3.44329
STMN3	1.43041	2.13257	5.13505	8.03155e-06	0.000174316	3.43563
TBX4	-1.55439	5.15113	-5.13243	8.09886e-06	0.000175501	3.42755
ZNF850	1.15809	2.57888	5.12176	8.37788e-06	0.000180695	3.39476
CLUHP3	-1.92275	1.33912	-5.11503	8.55884e-06	0.000183642	3.37408
HOXA13	-1.22747	3.58799	-5.11457	8.57136e-06	0.000183642	3.37266
TINAGL1	-2.06977	1.84676	-5.11421	8.58117e-06	0.000183642	3.37155
HLA-DRA	4.3264	0.649122	5.1128	8.61988e-06	0.000184185	3.3672
GPRASP1	-1.00583	7.20384	-5.11083	8.67371e-06	0.000185048	3.36117
SPAG4	-1.08338	3.8198	-5.10897	8.7252e-06	0.000185859	3.35544
FOS	-2.18542	9.02177	-5.10764	8.76208e-06	0.000186279	3.35136
PRDX1	1.13403	6.64556	5.10729	8.77194e-06	0.000186279	3.35027
C2	1.32653	4.3514	5.10634	8.79837e-06	0.000186487	3.34736
AEBP1	1.36324	9.6373	5.0903	9.25778e-06	0.000194498	3.29811
LOC148696	-1.77999	5.08604	-5.0882	9.31975e-06	0.000195502	3.29165
AEN	1.12803	3.06783	5.0845	9.42994e-06	0.000197513	3.28028
CTSK	1.04329	7.12006	5.08166	9.51526e-06	0.000198474	3.27156
DOCK10	2.79221	0.607773	5.07657	9.67004e-06	0.000200906	3.25595
ACPL2	1.60742	6.02754	5.06411	1.00597e-05	0.000207511	3.21773
FAM213B	1.86817	1.231	5.06398	1.00641e-05	0.000207511	3.21731
PART1	2.11305	5.78728	5.0637	1.00729e-05	0.000207511	3.21645
EFNA1	-1.87618	4.70913	-5.06164	1.0139e-05	0.00020825	3.21013
SLC39A3	1.61415	2.56511	5.06108	1.0157e-05	0.00020831	3.20841
ZFAND5	-1.53847	8.36816	-5.06034	1.01809e-05	0.000208488	3.20614
C12orf49	1.2053	2.28424	5.05002	1.05192e-05	0.000214144	3.17452
ARID5A	-1.30386	3.60627	-5.04243	1.07754e-05	0.000218392	3.15124
TTLL1	1.12957	1.62989	5.03922	1.08856e-05	0.000219578	3.1414
AVIL	1.48491	2.71682	5.03887	1.08976e-05	0.000219578	3.14033
ELN	1.77861	4.14949	5.03326	1.1093e-05	0.000222863	3.12314
TRAK1	1.08546	3.58792	5.03214	1.11325e-05	0.000223331	3.1197
CRY2	-1.02422	6.23906	-5.02377	1.14315e-05	0.000228662	3.09407
CYP8B1	2.05139	1.40518	5.01499	1.17538e-05	0.000234768	3.06719
ALDH2	-1.12625	5.05545	-5.01385	1.17962e-05	0.00023496	3.0637
LEPREL4	1.379	5.33073	5.01336	1.18145e-05	0.00023496	3.0622
FBXO31	-1.08434	5.10949	-5.01253	1.18458e-05	0.000235243	3.05964
SGSM1	-1.62718	2.9285	-5.00693	1.20578e-05	0.000239108	3.04249
PLIN2	-1.02436	4.15607	-5.00352	1.21884e-05	0.000241005	3.03207
ADCK1	1.00672	0.997795	5.00241	1.22314e-05	0.000241509	3.02867
TLE2	-1.14492	3.30272	-4.99875	1.23739e-05	0.000243972	3.01747
KCNJ9	-2.384	0.0827202	-4.99301	1.26008e-05	0.000247738	2.9999
BASP1	2.90709	1.44243	4.98887	1.27669e-05	0.000250645	2.98724
LOC150381	-1.20962	3.94743	-4.98692	1.28459e-05	0.000251763	2.98127
PRKD2	-1.03114	4.03055	-4.978	1.32132e-05	0.000257937	2.95402
PDXP	-1.45559	1.99831	-4.96976	1.35621e-05	0.000264374	2.92883
SAMD14	1.57881	0.366615	4.96923	1.35849e-05	0.000264446	2.9272
FLRT2	3.45972	1.84315	4.96318	1.38471e-05	0.000268411	2.90873
AKR1C2	1.66253	5.52804	4.96045	1.39673e-05	0.000270253	2.90037
PCYOX1L	1.3401	2.47468	4.96013	1.39813e-05	0.000270253	2.8994
RPS27	-1.52963	2.97771	-4.95946	1.40109e-05	0.00027031	2.89736
CTU1	1.11874	0.621186	4.95918	1.40235e-05	0.00027031	2.89649
TMEM184A	-1.37051	2.08962	-4.95716	1.41133e-05	0.000271661	2.89032
PDLIM7	1.53586	3.92869	4.9515	1.43679e-05	0.00027556	2.87304
GINS3	1.51084	2.95275	4.94904	1.448e-05	0.000277171	2.86553
OLFML3	2.08268	3.22893	4.94686	1.45801e-05	0.0002787	2.85887
PATL1	-1.22377	5.06669	-4.94556	1.464e-05	0.000279457	2.85491
IL31RA	2.2505	0.381674	4.9375	1.50173e-05	0.000285869	2.83032
TENM3	1.84331	2.67849	4.9359	1.50937e-05	0.000286531	2.82541
LOC100134229	-1.38023	3.12263	-4.93482	1.5145e-05	0.000286715	2.82214
METTL21A	1.21402	1.32764	4.92956	1.53987e-05	0.000290321	2.80609
CACNA1A	2.70873	1.05508	4.92824	1.54633e-05	0.000291141	2.80204
NAGPA	1.62295	1.86729	4.92341	1.57009e-05	0.000294808	2.78731
PLBD1	1.02736	5.02176	4.92257	1.57425e-05	0.000295187	2.78475
ADTRP	2.2298	1.52418	4.91736	1.60033e-05	0.000298859	2.76887
LRRC17	1.42393	2.34455	4.91165	1.62942e-05	0.000302646	2.75147
EPN2-AS1	-1.64351	1.87843	-4.91138	1.63081e-05	0.000302646	2.75065
CALD1	1.05112	7.84839	4.91102	1.63266e-05	0.000302646	2.74955
NNAT	1.07281	1.23212	4.90921	1.64206e-05	0.000303769	2.74401
NQO1	1.03106	2.9862	4.90828	1.64684e-05	0.000303892	2.7412
INMT	1.47999	0.691078	4.90525	1.66267e-05	0.000305919	2.73196
ASTN2	1.35593	1.25273	4.90039	1.68837e-05	0.000309843	2.71714
LDHD	-1.25524	3.13452	-4.89667	1.7083e-05	0.000312667	2.7058
SERTAD1	-1.30135	4.26241	-4.89372	1.72426e-05	0.00031468	2.69682
CCDC164	2.14481	0.583978	4.89337	1.72615e-05	0.00031468	2.69576
RELA	-1.29577	6.14538	-4.89132	1.73733e-05	0.000315742	2.68953
FAM83G	-2.28205	2.84861	-4.88705	1.76089e-05	0.000319324	2.67652
DYSF	1.30432	4.57932	4.88513	1.77158e-05	0.00032084	2.67067
USP36	-1.00166	5.25409	-4.87903	1.80598e-05	0.00032536	2.6521
ANKRD37	-2.70103	2.88191	-4.87676	1.81896e-05	0.00032727	2.64518
ZNF292	-1.20802	8.03056	-4.87619	1.82221e-05	0.000327428	2.64346
TBXA2R	2.15186	0.0214394	4.87314	1.83982e-05	0.000330161	2.63417
IL6R	-1.92634	5.54504	-4.85854	1.9264e-05	0.000343392	2.58977
NEFH	2.05605	1.02966	4.85779	1.93099e-05	0.000343392	2.58747
RPS6KA5	-1.06621	3.12769	-4.85657	1.93839e-05	0.000344264	2.58378
PLEKHA2	-1.0251	4.16435	-4.85549	1.945e-05	0.000344993	2.58049
EIF4A3	-1.07446	4.6324	-4.85399	1.95421e-05	0.000346182	2.57593
FUCA1	1.14803	4.63467	4.84953	1.98183e-05	0.000350623	2.56238
SLC36A1	1.6664	2.1514	4.84443	2.01394e-05	0.000354485	2.54686
ZFP3	1.21516	2.64732	4.83837	2.05273e-05	0.000360851	2.52845
PITX1	-1.63846	5.19443	-4.83532	2.07247e-05	0.000363394	2.51921
NR4A3	-1.92455	2.70883	-4.83133	2.09865e-05	0.00036705	2.50709
SYT11	1.70965	2.67904	4.82801	2.1207e-05	0.000370389	2.497
GLB1L3	1.75444	2.4595	4.82725	2.1258e-05	0.000370389	2.49468
SMOC1	1.68219	7.71671	4.82439	2.14499e-05	0.000373261	2.48601
NIP7	1.40315	2.38459	4.81697	2.19566e-05	0.000381593	2.46347
EGR1	-1.87248	8.46661	-4.81106	2.23679e-05	0.000387766	2.44556
FZD5	-1.64935	2.85444	-4.80794	2.25887e-05	0.000391102	2.43608
SYNDIG1	2.71574	1.17029	4.80289	2.29503e-05	0.000396368	2.42076
FOXJ2	-1.00488	5.40541	-4.79354	2.36345e-05	0.00040553	2.39241
FZD8	1.37356	6.5478	4.79323	2.36574e-05	0.00040553	2.39148
LUM	1.62198	12.2208	4.78972	2.39196e-05	0.000409516	2.38084
PCNA	1.05366	4.14018	4.78651	2.41621e-05	0.000412791	2.37111
HRCT1	1.95063	2.74932	4.78639	2.41709e-05	0.000412791	2.37076
ORAI3	-1.2025	4.8127	-4.78184	2.45187e-05	0.000418214	2.35698
ADCY2	-1.07048	6.36195	-4.77941	2.47064e-05	0.000420375	2.34962
ZNF815P	1.59284	0.633469	4.7759	2.49806e-05	0.000424517	2.33897
CLK3	-1.1134	5.39363	-4.77526	2.50309e-05	0.000424848	2.33703
RAB23	1.16226	4.06442	4.76902	2.55261e-05	0.000432718	2.31814
CTHRC1	2.0666	5.94042	4.76835	2.55791e-05	0.000433085	2.31613
INSC	2.4414	3.39692	4.76202	2.60922e-05	0.000439124	2.29698
IPO13	1.10122	3.35444	4.75676	2.65268e-05	0.000445301	2.28104
AVPR1A	-2.92338	1.76684	-4.75515	2.66611e-05	0.000447011	2.27617
IDI2-AS1	-1.55271	1.44009	-4.75068	2.70373e-05	0.000452219	2.26266
FOXO3	-1.12575	7.78531	-4.74534	2.74941e-05	0.000458745	2.2465
KBTBD6	1.134	4.0715	4.74268	2.77242e-05	0.000461998	2.23847
DPY19L2	-1.11006	3.33256	-4.74231	2.77561e-05	0.000461998	2.23736
VAT1L	2.14872	1.47047	4.74188	2.77935e-05	0.000462063	2.23606
LOC284950	-1.86499	0.894309	-4.74117	2.78555e-05	0.000462446	2.23391
CYB5A	1.33135	2.17997	4.74047	2.79172e-05	0.000462446	2.23178
KIF4A	1.84534	0.837707	4.73904	2.80423e-05	0.000463961	2.22746
TCF7	-1.03148	3.63681	-4.73726	2.81994e-05	0.000465751	2.22208
PDLIM4	-1.34058	5.54339	-4.73705	2.82181e-05	0.000465751	2.22144
ZHX2	-1.04224	5.86215	-4.73539	2.8365e-05	0.000467615	2.21643
BPGM	1.00775	4.47827	4.7347	2.84262e-05	0.000468064	2.21436
FBLN5	1.74558	2.96071	4.73379	2.85075e-05	0.000468656	2.2116
CCNB1IP1	-1.32816	5.0662	-4.73354	2.85301e-05	0.000468656	2.21083
SBSPON	1.64148	6.05466	4.73085	2.87717e-05	0.0004715	2.20271
FZD10	2.27667	1.77764	4.72727	2.90955e-05	0.00047624	2.19192
ANGPTL2	1.8303	9.68592	4.72597	2.92148e-05	0.000477626	2.18797
FP588	-1.23207	2.10038	-4.72475	2.93263e-05	0.000478529	2.1843
CDKN2B	1.52949	1.54561	4.72461	2.93395e-05	0.000478529	2.18386
TSPAN2	1.78122	6.97918	4.72324	2.94652e-05	0.000479561	2.17974
PTGER3	2.55444	1.95321	4.72317	2.94723e-05	0.000479561	2.17951
GAS1	1.43357	7.13653	4.71605	3.0136e-05	0.000487482	2.15804
TRPV2	1.51573	1.55492	4.70971	3.07411e-05	0.000496105	2.13888
EP400NL	1.11266	1.82816	4.70782	3.09228e-05	0.000498453	2.1332
PRDM16	-1.77	2.41139	-4.70627	3.10739e-05	0.000500305	2.1285
PALD1	-1.6914	4.30901	-4.7057	3.11293e-05	0.000500612	2.12678
ZNF185	-1.00961	3.53393	-4.70471	3.12255e-05	0.000501019	2.12381
COL8A1	3.13143	1.31375	4.70167	3.15239e-05	0.000504603	2.11464
C3orf62	1.03117	2.25456	4.69914	3.17741e-05	0.000508018	2.10702
SSX2IP	1.66027	3.01194	4.69734	3.19542e-05	0.000510305	2.10157
GTF3C6	1.16399	3.87461	4.69663	3.20253e-05	0.000510847	2.09943
MYOC	-3.084	3.85795	-4.69218	3.2474e-05	0.000517406	2.08602
ITGB8	2.31178	6.92218	4.68967	3.27304e-05	0.000519479	2.07844
FLJ27352	1.08356	0.794091	4.68725	3.29788e-05	0.00052207	2.07116
FBXO32	-1.07276	4.46002	-4.6858	3.31286e-05	0.000523599	2.06679
S1PR3	1.49801	2.60774	4.68435	3.32788e-05	0.00052537	2.06243
COL6A1	1.28581	10.1484	4.67353	3.44244e-05	0.000539133	2.02982
IRF2BPL	-1.09665	4.85432	-4.67159	3.46338e-05	0.000541798	2.02397
LOC284648	-1.43042	1.76317	-4.66645	3.51942e-05	0.000549317	2.00851
ZCCHC5	1.49849	1.19959	4.66334	3.55381e-05	0.000554057	1.99914
BCKDHA	-1.16632	4.20525	-4.66052	3.58526e-05	0.000557698	1.99065
GPRC5B	-1.36803	5.00375	-4.65014	3.70337e-05	0.000571722	1.95943
ADAMTS5	1.92929	5.01929	4.65	3.70493e-05	0.000571722	1.95902
BCL6	-1.53012	8.3813	-4.64947	3.71106e-05	0.000571722	1.95743
IGSF8	-1.03463	4.28508	-4.64478	3.76576e-05	0.000577305	1.94334
NR4A2	-1.72141	5.49901	-4.64292	3.78775e-05	0.000579387	1.93773
STAB1	1.45931	3.75073	4.64008	3.82143e-05	0.0005829	1.9292
BTBD11	1.26941	4.38034	4.63999	3.82256e-05	0.0005829	1.92892
SREBF1	-1.11971	5.44959	-4.63992	3.8234e-05	0.0005829	1.92871
C4orf47	-1.42863	3.74415	-4.63617	3.8684e-05	0.000587939	1.91744
MPZL2	1.44979	2.84162	4.6361	3.86925e-05	0.000587939	1.91723
UBTD1	-1.0356	3.72252	-4.6327	3.9105e-05	0.000593553	1.90701
ABLIM3	1.9918	1.60007	4.63217	3.91695e-05	0.000593877	1.90543
CSNK1D	-1.11206	6.24913	-4.63126	3.92812e-05	0.000594916	1.90269
C1R	1.18372	8.26593	4.63008	3.94252e-05	0.000596441	1.89916
ZC3H12A	-1.37814	2.97344	-4.62838	3.96354e-05	0.000598964	1.89404
PTGES	1.71372	4.73629	4.62753	3.97405e-05	0.000599239	1.89149
GPR176	1.83337	2.01313	4.6218	4.04571e-05	0.000608047	1.87428
RASD1	-1.73552	5.66692	-4.61796	4.09436e-05	0.000614689	1.86277
GPR153	1.54837	3.15062	4.61212	4.16957e-05	0.000624406	1.84525
LOC100506136	1.09224	1.28043	4.61061	4.18929e-05	0.000626212	1.8407
LOC441666	2.4597	0.848034	4.61003	4.1969e-05	0.000626671	1.83896
RSPO2	2.48111	4.74596	4.60851	4.21684e-05	0.000628967	1.83439
EGR3	-2.06287	3.34602	-4.60737	4.23178e-05	0.000630512	1.83099
GPR146	-1.52916	1.92331	-4.58902	4.48063e-05	0.000662576	1.77599
EML1	1.01782	5.95095	4.58867	4.48556e-05	0.000662594	1.77493
HLA-L	-1.55659	3.24966	-4.58436	4.54619e-05	0.00066797	1.762
METRNL	-1.13613	5.04835	-4.58198	4.5799e-05	0.000670226	1.75489
FAM186A	1.60413	0.965652	4.58194	4.58056e-05	0.000670226	1.75476
NUSAP1	1.61335	1.14556	4.58156	4.58586e-05	0.000670226	1.75364
EIF4E2	1.09084	4.36264	4.5794	4.61685e-05	0.000673327	1.74716
PPM1J	-1.69269	1.60336	-4.57871	4.62683e-05	0.000673358	1.74508
OGFR	-1.10635	4.50807	-4.57686	4.65352e-05	0.000676528	1.73955
PLD1	1.01252	4.13623	4.5742	4.69214e-05	0.000681099	1.73159
TYRO3	1.42558	1.72496	4.56788	4.78531e-05	0.000690587	1.71268
HIST1H2AK	-2.01242	0.405792	-4.56362	4.84912e-05	0.0006977	1.69993
EMC9	-1.39038	2.35298	-4.56357	4.84978e-05	0.0006977	1.6998
BAALC	1.85101	4.66454	4.5621	4.87209e-05	0.000699449	1.69538
NRP2	1.59228	6.16957	4.56011	4.90223e-05	0.000702516	1.68945
ZSWIM3	2.42181	0.412491	4.55937	4.91361e-05	0.000702516	1.68722
SGK1	1.7992	4.62069	4.55935	4.91384e-05	0.000702516	1.68717
TNFRSF1B	-2.01654	1.93952	-4.55682	4.95262e-05	0.000706093	1.67961
TIMP3	1.03042	8.79447	4.55432	4.99132e-05	0.000709911	1.67212
CTGF	1.3187	10.4903	4.55157	5.03412e-05	0.000714524	1.66391
C22orf26	-2.2699	3.001	-4.54655	5.11325e-05	0.000724263	1.6489
TSKU	-1.1757	4.47475	-4.5394	5.22813e-05	0.000735997	1.62753
FLJ31485	2.32895	0.627921	4.53785	5.25321e-05	0.00073829	1.62293
NXT2	1.07768	2.63356	4.53419	5.3133e-05	0.000744942	1.61199
ANGPTL1	1.24324	4.38118	4.53288	5.33494e-05	0.000746459	1.60808
CMTM3	1.07373	3.68245	4.52108	5.53394e-05	0.000770391	1.57286
GRASP	-1.6121	1.02108	-4.51986	5.55496e-05	0.000771795	1.56922
THSD4	-1.20211	4.26287	-4.51984	5.55522e-05	0.000771795	1.56917
PANK1	2.03646	0.347013	4.51851	5.57824e-05	0.000774212	1.5652
FAT3	2.23524	2.54819	4.51394	5.65787e-05	0.000784474	1.55157
TULP3	-1.10863	5.56702	-4.51247	5.68362e-05	0.000785827	1.5472
METRN	1.40973	2.45451	4.51241	5.68473e-05	0.000785827	1.54701
ODF3L1	-1.10448	1.13741	-4.50994	5.7284e-05	0.000791071	1.53965
LNX1	1.01603	4.5853	4.50703	5.78041e-05	0.000796656	1.53096
NPFF	1.48254	1.51114	4.5051	5.81508e-05	0.000800634	1.52522
RAB31	1.71083	4.27849	4.5003	5.90214e-05	0.000811543	1.51093
LHFPL2	1.04409	6.06505	4.50009	5.90609e-05	0.000811543	1.51029
ELL2	-1.36947	8.4216	-4.49834	5.93818e-05	0.000814329	1.50508
KIAA0355	-1.19354	5.7678	-4.49744	5.95471e-05	0.000815783	1.50241
GAB1	-1.02908	6.10649	-4.49482	6.00329e-05	0.000820971	1.49459
SPSB4	1.43225	2.46756	4.49475	6.00449e-05	0.000820971	1.4944
TMEM107	-1.16694	3.82048	-4.49214	6.05325e-05	0.000826096	1.48663
NRP1	1.53061	5.14199	4.48706	6.14925e-05	0.000836428	1.4715
SPTSSB	2.26376	2.71373	4.48344	6.21856e-05	0.000843545	1.46073
HAPLN1	1.44978	9.67033	4.48208	6.24481e-05	0.000844612	1.45668
ENO2	-1.56155	6.57385	-4.47507	6.38177e-05	0.000859762	1.43583
BRE-AS1	-2.22061	0.418928	-4.47322	6.41852e-05	0.000863867	1.43032
AKNA	-1.0933	4.7221	-4.47232	6.43635e-05	0.000864579	1.42765
SH2B2	-1.49961	0.172989	-4.47096	6.46349e-05	0.000867379	1.42361
CENPK	1.74596	0.44168	4.4651	6.58166e-05	0.00087981	1.4062
SLC44A5	2.50588	0.124346	4.46304	6.62382e-05	0.000883848	1.40006
SLAIN1	-1.28725	2.20028	-4.46012	6.68384e-05	0.000887702	1.3914
ADAMTS2	2.12046	5.07004	4.46003	6.68578e-05	0.000887702	1.39112
ITGAM	2.65148	0.0763424	4.45928	6.70131e-05	0.000888179	1.38889
GRIN2A	2.65077	2.05377	4.4574	6.74021e-05	0.000890638	1.38333
NR3C2	-1.10498	4.70097	-4.45314	6.82962e-05	0.000901588	1.37067
CAMK2A	1.49948	0.567109	4.45165	6.86125e-05	0.000904897	1.36623
GABARAPL1	-1.01871	6.13322	-4.44473	7.00949e-05	0.000920923	1.34569
TMEM180	1.24903	1.0556	4.4418	7.07316e-05	0.000928025	1.33701
RPS16P5	-2.0922	2.76628	-4.44093	7.09209e-05	0.000928235	1.33444
TNIP1	-1.02691	6.48655	-4.44015	7.10928e-05	0.000929162	1.33212
WISP1	1.33279	5.68813	4.44	7.11265e-05	0.000929162	1.33166
CDKN3	1.51551	1.32323	4.43754	7.16687e-05	0.000935358	1.32437
VPS37D	-1.05805	1.23072	-4.43666	7.18632e-05	0.00093701	1.32176
ADCY1	1.2911	1.93834	4.43247	7.27998e-05	0.000947429	1.30933
ROR1	2.11164	1.92286	4.42325	7.49e-05	0.000972923	1.28202
C14orf182	1.32587	0.259856	4.42137	7.53361e-05	0.000977666	1.27644
RPL23AP32	1.56212	1.05105	4.41703	7.63508e-05	0.000987117	1.26359
CLEC11A	1.70893	3.95572	4.41307	7.72894e-05	0.00099826	1.25186
GPX7	1.65456	3.07606	4.41254	7.74151e-05	0.00099826	1.2503
ITPA	1.00679	2.81565	4.41234	7.74637e-05	0.00099826	1.2497
LOC100216545	-1.00708	4.78283	-4.41012	7.79945e-05	0.00100272	1.24314
DPT	1.63056	6.73924	4.40877	7.83211e-05	0.00100505	1.23913
ERI2	1.07215	3.78997	4.40719	7.87028e-05	0.00100856	1.23446
COL2A1	2.78341	12.8599	4.40704	7.87408e-05	0.00100856	1.234
SNX25	-1.103	4.54586	-4.40194	7.99863e-05	0.00102356	1.21893
PER2	-1.42928	6.36555	-4.40071	8.02914e-05	0.00102556	1.21528
RPP40	1.19876	1.51232	4.39915	8.06767e-05	0.00102857	1.21069
PCSK6	1.77248	1.27273	4.39837	8.08724e-05	0.00103011	1.20836
RORA	-1.00216	8.01585	-4.39795	8.09757e-05	0.00103048	1.20713
PITPNM3	1.22049	1.61071	4.39757	8.10721e-05	0.00103075	1.20599
KDM3A	-1.98674	6.15701	-4.39449	8.18437e-05	0.00103769	1.1969
MVB12B	1.06256	1.8568	4.39094	8.27436e-05	0.00104717	1.1864
RPIA	1.24248	2.12018	4.38722	8.36971e-05	0.00105827	1.17541
SLC16A10	1.58463	4.05147	4.38663	8.38508e-05	0.00105924	1.17365
ARRDC2	-1.07341	4.78691	-4.38176	8.51161e-05	0.00106788	1.15927
C1orf51	-1.35153	4.37616	-4.37716	8.63302e-05	0.00108164	1.14568
ADAM12	1.70768	4.57556	4.37487	8.694e-05	0.00108829	1.13893
FGL2	-1.47229	3.39629	-4.37308	8.7421e-05	0.00109332	1.13363
CARD6	1.42453	2.39823	4.36724	8.9004e-05	0.0011111	1.11641
C1QTNF1	1.65767	3.28635	4.36273	9.02466e-05	0.00112356	1.10311
ZNF791	-1.12983	5.19942	-4.36	9.10069e-05	0.00113079	1.09506
FAM171A1	1.70916	2.32655	4.35631	9.2047e-05	0.00114082	1.08416
GEN1	1.94334	2.02768	4.35196	9.32847e-05	0.00115109	1.07135
MAB21L2	-1.14237	2.89067	-4.35193	9.32935e-05	0.00115109	1.07126
MICAL2	1.36024	3.92521	4.34469	9.53917e-05	0.00117174	1.04993
SFMBT2	-1.31233	4.89935	-4.34439	9.54785e-05	0.00117176	1.04906
HTRA3	1.62578	4.32897	4.34342	9.57647e-05	0.00117422	1.04618
UCP2	1.91459	1.51012	4.34154	9.63194e-05	0.00117788	1.04065
DOPEY2	1.29222	1.93997	4.34087	9.6516e-05	0.00117924	1.03869
LAMC3	-1.56086	3.71761	-4.34038	9.66605e-05	0.00117996	1.03725
SDC4	-1.25967	6.76118	-4.33882	9.7125e-05	0.00118458	1.03266
ZNF703	-1.05109	3.19484	-4.32605	0.000101009	0.00122869	0.99506
OXNAD1	-1.28888	4.79447	-4.32506	0.000101314	0.00123094	0.992162
TRIB1	-1.64973	3.86721	-4.32487	0.000101373	0.00123094	0.991611
MAP1A	1.14769	5.56892	4.3196	0.000103024	0.00124989	0.976119
RGS19	2.29226	0.865252	4.31699	0.000103852	0.00125662	0.968442
TACR2	-1.31119	1.36402	-4.31544	0.000104348	0.00126041	0.963878
ARIH2OS	-1.38093	0.744503	-4.31484	0.000104539	0.00126161	0.962122
NDNF	-1.0777	7.25816	-4.313	0.000105132	0.00126557	0.956705
JPH1	-1.53125	0.660243	-4.31199	0.000105458	0.00126715	0.953734
GGTA1P	-1.55122	3.29057	-4.3111	0.000105745	0.00126949	0.951129
MIR31HG	2.06717	0.795603	4.3082	0.000106689	0.0012786	0.942607
FAM133A	2.03888	0.0673018	4.30505	0.000107725	0.00128877	0.933346
RARRES1	2.40601	1.49398	4.29721	0.000110342	0.00131438	0.910342
MEG3	-1.18917	6.77651	-4.29581	0.000110815	0.00131773	0.906242
COL7A1	1.19329	4.16234	4.29519	0.000111028	0.00131912	0.904406
C6orf163	1.03998	2.04584	4.29154	0.000112275	0.00132994	0.893702
TUBB1	1.5414	0.0951756	4.28817	0.000113438	0.00133738	0.883825
ASH1L-AS1	-1.83048	1.19336	-4.28658	0.000113992	0.00134276	0.879159
NT5DC2	1.07403	3.8753	4.28187	0.000115644	0.00135875	0.865368
KCNK5	-1.43869	6.48314	-4.27908	0.000116636	0.00136807	0.857184
SLC9C1	2.30636	0.416297	4.27719	0.000117312	0.00137254	0.851654
MON1A	1.53435	0.923445	4.27718	0.000117316	0.00137254	0.851614
ICA1	1.15336	2.34464	4.26627	0.000121294	0.00141308	0.81967
PHF3	-1.20407	8.08709	-4.26425	0.000122044	0.00141941	0.813771
MYO3A	2.89388	1.06499	4.26192	0.000122918	0.00142765	0.806931
CELF2	1.7365	2.19814	4.25835	0.000124266	0.00144039	0.796491
NAT1	1.5227	0.807397	4.2579	0.000124435	0.00144066	0.795184
LINC00167	-1.70135	0.850667	-4.25774	0.000124497	0.00144066	0.794705
FAM169A	1.50297	0.881341	4.25472	0.000125651	0.00145279	0.785869
LRCH2	-1.01921	1.9209	-4.24724	0.000128553	0.00147521	0.764004
GLRX5	1.071	2.91005	4.24545	0.000129254	0.00148041	0.758797
G0S2	-2.0267	2.88718	-4.24511	0.000129388	0.00148041	0.757805
FOXI2	-2.53712	1.28642	-4.24491	0.000129469	0.00148041	0.757204
TFDP1	1.06328	4.13869	4.24472	0.000129544	0.00148041	0.756656
ALDH1A2	1.26133	5.91768	4.2418	0.000130703	0.00149081	0.748125
YEATS2	-1.06752	6.3027	-4.2416	0.000130781	0.00149081	0.747554
ANKRD65	1.20017	2.89415	4.2401	0.000131384	0.00149401	0.743147
KIAA1522	-1.14978	2.41677	-4.22837	0.000136169	0.00154332	0.708906
SEMA5A	1.51714	2.1675	4.22748	0.000136537	0.00154495	0.706322
CAPS	1.17701	4.93479	4.22462	0.000137734	0.00155721	0.697967
C5orf56	-1.06963	2.41383	-4.22227	0.000138723	0.00156328	0.691112
NFKB2	-1.17327	4.04616	-4.22142	0.000139083	0.00156477	0.688636
KIF5C	2.54181	1.38685	4.2209	0.000139301	0.00156497	0.687133
TBC1D2B	-1.30769	5.44418	-4.21575	0.000141502	0.00158551	0.672131
C20orf111	-1.04915	5.51209	-4.21477	0.000141928	0.00158899	0.669255
RGS17	1.42113	1.14807	4.20732	0.000145182	0.00161754	0.647564
BEX2	-2.32001	3.34739	-4.20679	0.000145418	0.00161886	0.646007
PLK2	-2.33578	1.29841	-4.19926	0.000148786	0.00165369	0.624099
PPP1R3E	-1.03542	4.26285	-4.19575	0.000150383	0.00166606	0.613883
FZD1	1.0785	4.77492	4.19249	0.000151883	0.00167594	0.604391
CXXC4	-1.24827	2.22985	-4.19091	0.000152613	0.00167996	0.599805
DIRAS1	1.76486	2.032	4.18781	0.000154056	0.0016945	0.5908
C9orf72	-1.28059	3.96126	-4.18709	0.000154393	0.0016955	0.588709
F2RL3	-1.89484	1.611	-4.18577	0.000155016	0.00170098	0.584859
PDE8B	1.00171	2.36781	4.18227	0.000156675	0.00171645	0.574679
BCL3	-1.41257	3.90739	-4.18127	0.000157152	0.00171895	0.571768
FLJ35282	-1.1711	2.96797	-4.18057	0.000157484	0.00172121	0.569749
SORL1	-1.23616	5.23036	-4.17921	0.000158138	0.00172699	0.565786
GALNT1	1.07741	5.81844	4.17845	0.000158503	0.00172961	0.56358
FMNL1	1.85637	0.90628	4.177	0.000159201	0.00173584	0.55938
FDXACB1	1.77537	0.355216	4.17431	0.000160509	0.00174734	0.551553
RAB38	1.87362	2.01905	4.17355	0.000160879	0.00174861	0.549352
CDHR4	1.55669	1.07413	4.17035	0.000162449	0.00175981	0.540066
SLC16A3	-1.03106	6.64717	-4.17015	0.000162548	0.00175981	0.539483
CIRBP-AS1	-1.11785	1.46302	-4.16434	0.00016544	0.00178272	0.522618
AOX1	-1.01959	5.27816	-4.15572	0.000169823	0.00182424	0.497622
NGF	3.23185	0.582897	4.1549	0.000170245	0.00182735	0.495245
NRK	1.05914	6.46725	4.15427	0.00017057	0.00182942	0.493422
PON2	1.1864	4.46296	4.15158	0.000171964	0.00184089	0.48564
LRRN2	1.46707	2.2354	4.15133	0.000172097	0.00184089	0.484902
IRF4	-2.49674	0.582374	-4.14918	0.00017322	0.00184777	0.478686
SERPINF1	1.61117	2.73162	4.14675	0.000174501	0.00185999	0.471644
NYAP1	-1.30608	2.1494	-4.14599	0.000174905	0.00186285	0.469436
ABCA12	1.73681	0.538096	4.14407	0.000175925	0.00187142	0.463874
RHOU	-1.1477	5.88165	-4.14127	0.000177425	0.00188388	0.455758
MLLT4-AS1	-2.37826	1.33743	-4.13261	0.00018214	0.00192504	0.430696
USP2	-1.15385	2.45461	-4.13037	0.000183379	0.00193665	0.424218
MYO15B	-1.00034	5.5345	-4.12881	0.000184244	0.00194429	0.419722
TMSB4X	1.6029	4.18419	4.12788	0.000184763	0.0019477	0.41703
DKFZP686I15217	-1.05335	2.82554	-4.12773	0.000184849	0.0019477	0.416586
FIGNL2	1.29228	0.488953	4.12702	0.000185246	0.00194931	0.414538
CLP1	1.52512	1.0774	4.12695	0.000185285	0.00194931	0.414337
DKK3	1.77721	6.455	4.11842	0.000190131	0.00199284	0.389668
PGF	-1.3627	3.02725	-4.11576	0.000191666	0.00200256	0.381986
ANKZF1	-1.15352	6.09223	-4.11556	0.000191778	0.00200256	0.38143
GPR156	1.16047	0.405321	4.11553	0.0001918	0.00200256	0.381321
EHD1	-1.16704	3.87901	-4.11499	0.000192112	0.0020043	0.379768
C12orf60	1.52318	0.190725	4.11285	0.000193356	0.00201576	0.373601
APOD	-2.87196	8.48451	-4.10531	0.000197816	0.00205448	0.351821
FNDC5	1.34094	0.83578	4.10373	0.00019876	0.00206273	0.347274
RAG1	1.99211	0.156945	4.09898	0.000201631	0.00208525	0.333577
VIPR1	-2.29991	0.303646	-4.09487	0.000204153	0.0021076	0.321704
HCLS1	1.27556	1.41445	4.09415	0.000204595	0.00211006	0.319642
VLDLR	-1.2548	4.05711	-4.09319	0.000205187	0.00211351	0.316883
RASSF4	-1.00396	3.08055	-4.09061	0.000206794	0.00212531	0.309432
TM4SF1	1.22597	5.78398	4.08771	0.000208612	0.0021424	0.301072
PLXDC1	2.09334	2.4129	4.08582	0.000209803	0.00215302	0.295639
ARSI	2.13659	0.665396	4.08338	0.000211353	0.00216731	0.288613
KIAA1644	2.32645	0.874492	4.08168	0.000212438	0.00217682	0.283723
TMC7	1.21421	0.822592	4.07775	0.000214974	0.00219464	0.272396
LOC158376	1.53792	0.914142	4.0738	0.000217549	0.00221879	0.261028
LOC100129917	-1.53636	3.49049	-4.07111	0.000219314	0.00223069	0.253314
C15orf39	-1.07208	3.4837	-4.06822	0.000221235	0.00224691	0.244992
TWIST1	1.89156	1.89712	4.06351	0.000224395	0.00227398	0.231458
PNPLA7	-1.085	3.65817	-4.06119	0.000225968	0.00228824	0.224789
HSBP1	1.10112	5.53214	4.05331	0.00023139	0.00233457	0.202165
KDM6B	-1.40909	4.3105	-4.05265	0.000231853	0.00233753	0.200256
MGAT4B	1.06612	4.3225	4.05161	0.000232582	0.00234145	0.197261
SH3D21	-2.0121	4.15184	-4.04897	0.000234431	0.00235835	0.189705
GPM6A	-1.28143	2.6078	-4.04616	0.000236424	0.00237492	0.181632
LRRC8C	2.26219	2.68275	4.03507	0.000244441	0.00244299	0.149823
NLN	1.02532	3.69795	4.02365	0.000252968	0.00251726	0.117122
GPX3	-1.75403	10.3231	-4.02205	0.000254186	0.00252755	0.112541
IER3	-1.58389	5.67038	-4.01853	0.000256886	0.00254809	0.102466
KIAA1462	-1.2192	5.84609	-4.01839	0.000256991	0.00254809	0.102076
SH3RF2	-1.10712	2.12357	-4.01578	0.000259015	0.00255785	0.0945939
LRP5	-1.05288	4.29807	-4.01545	0.000259272	0.00255785	0.0936491
F13A1	-1.59261	6.00327	-4.01472	0.000259838	0.00255975	0.0915702
JMY	-1.62603	5.31039	-4.01365	0.000260673	0.00256431	0.0885115
MPP3	1.04591	2.30856	4.00909	0.000264268	0.00259042	0.0754559
TMBIM1	-1.00882	7.03925	-4.00861	0.000264647	0.00259067	0.0740888
GPR133	-1.90727	1.44092	-4.00822	0.000264956	0.00259067	0.0729754
DSEL	1.32733	6.04366	4.0054	0.000267202	0.00260806	0.0649282
CDK5	1.28457	0.86045	4.00394	0.000268377	0.0026149	0.060748
DEPDC1B	1.46806	0.127421	4.00326	0.000268922	0.00261743	0.0588135
CSRNP3	1.87248	1.06425	4.00115	0.00027063	0.00263034	0.0527775
C3orf52	2.08885	0.7593	3.99857	0.000272732	0.00264195	0.0454036
TUSC2	1.01643	3.18708	3.99804	0.000273166	0.00264195	0.0438892
ENOX1	1.29747	3.3262	3.99109	0.000278907	0.00268804	0.0240674
PCK1	-2.46687	1.57016	-3.98644	0.000282815	0.00272	0.010808
PROS1	1.01281	5.47567	3.98369	0.00028515	0.00273864	0.00297319
PARM1	-1.30088	6.82719	-3.98122	0.000287271	0.00275709	-0.00408762
APBB1IP	2.48595	0.994204	3.97867	0.000289471	0.00277433	-0.0113538
JUP	-1.16262	3.65202	-3.97453	0.00029308	0.00280113	-0.0231568
S100A3	1.52855	1.46141	3.9721	0.000295216	0.00281764	-0.0300753
RNF144B	-1.14678	4.60717	-3.96925	0.000297741	0.0028378	-0.0381876
ALDH1L1-AS2	-2.02436	0.0782089	-3.96723	0.000299542	0.00285103	-0.0439323
UCP3	1.32984	0.847945	3.96378	0.000302647	0.00287462	-0.0537529
LOC284023	-1.48147	1.93793	-3.9633	0.000303082	0.00287677	-0.0551207
ABHD4	-1.10198	3.64447	-3.96183	0.000304413	0.00288345	-0.0592954
GINS1	1.50611	0.171763	3.96106	0.000305113	0.0028881	-0.0614821
ANK3	1.53522	7.36459	3.94749	0.000317726	0.00298697	-0.100052
ARL4C	2.03235	2.41055	3.94188	0.000323085	0.00302908	-0.115975
FAM86A	1.17381	0.762523	3.93983	0.000325068	0.00304383	-0.1218
BFSP1	1.43092	3.98832	3.9379	0.000326939	0.00305483	-0.127264
PXN-AS1	-1.1892	0.456029	-3.93657	0.00032824	0.00306385	-0.131045
S1PR2	-1.08155	3.10099	-3.93473	0.000330049	0.00307763	-0.136274
GRIK3	1.80511	2.48518	3.93112	0.00033362	0.00310253	-0.146518
LOC100505549	1.3845	1.55015	3.93112	0.00033362	0.00310253	-0.146518
TPRG1	-1.14814	4.0719	-3.92629	0.000338448	0.00313896	-0.160191
SPA17	1.14117	0.87931	3.92572	0.000339025	0.00314052	-0.161813
PTGS2	-1.81193	4.53205	-3.92228	0.000342512	0.003166	-0.171549
CSF1R	1.64348	1.35103	3.92192	0.000342883	0.0031673	-0.172578
USP31	1.08267	3.52846	3.92069	0.000344141	0.00317467	-0.176063
ZNF423	1.12974	2.16699	3.91683	0.000348111	0.003207	-0.186977
MSX2	1.30354	1.40236	3.91362	0.000351451	0.0032356	-0.196061
FBLN1	-1.75983	4.65504	-3.91008	0.000355174	0.00326175	-0.206086
PLK1	1.26458	0.698547	3.91002	0.000355238	0.00326175	-0.206257
LINGO4	-1.94986	0.331921	-3.90589	0.000359624	0.00329544	-0.21793
C12orf75	1.48269	3.16562	3.90564	0.00035989	0.00329569	-0.218634
MATN3	1.96476	5.54103	3.89955	0.000366465	0.0033451	-0.235853
UPP1	-1.10523	3.52902	-3.89952	0.0003665	0.0033451	-0.235944
AKR7A2P1	-2.7195	0.842906	-3.89583	0.000370543	0.00337307	-0.246377
CLSPN	2.00523	0.357051	3.89162	0.000375195	0.00341091	-0.25824
TF	1.74853	5.6848	3.89068	0.000376247	0.00341822	-0.260903
SKAP2	1.00211	3.72894	3.89031	0.000376665	0.00341976	-0.26196
AQP1	1.91381	5.83134	3.88978	0.00037725	0.00342221	-0.263434
DDX25	2.06737	0.490616	3.88694	0.000380448	0.00344729	-0.271461
FAM222A	-1.64593	2.52023	-3.88059	0.000387687	0.00349789	-0.289381
HMGCR	1.14305	4.02521	3.8796	0.000388829	0.00350051	-0.292177
PLTP	1.91559	4.2096	3.87957	0.000388861	0.00350051	-0.292255
MUM1L1	1.60362	1.03791	3.87855	0.000390038	0.00350653	-0.295129
ARPC5	1.0688	4.68913	3.87804	0.000390625	0.00350952	-0.296558
DNMT3B	1.23956	0.372121	3.87731	0.000391477	0.00351487	-0.298627
RNU11	-1.78836	1.96571	-3.87457	0.000394665	0.00353268	-0.306337
MYC	-1.25246	3.89492	-3.87258	0.000396995	0.00354364	-0.311932
SRPX	1.68527	2.06169	3.86648	0.000404242	0.00359437	-0.329127
DLGAP2	-1.73953	1.02359	-3.86552	0.000405396	0.0036023	-0.331836
NR4A1	-1.85559	5.08695	-3.86084	0.000411048	0.00364079	-0.344992
GABRA4	1.41399	5.16832	3.85657	0.000416278	0.0036753	-0.357005
MIR210HG	-1.48556	6.00778	-3.85496	0.000418269	0.00368312	-0.361537
FLG2	1.79949	0.0845969	3.85456	0.000418767	0.00368312	-0.36267
CCDC112	1.34938	0.899627	3.85263	0.000421163	0.00369947	-0.368089
LOC100507156	-2.0115	3.05701	-3.85087	0.00042336	0.0037164	-0.373032
RPS6KA4	1.19274	2.33005	3.84962	0.000424923	0.00372774	-0.376532
NCF2	1.90457	0.180123	3.84689	0.00042837	0.00375321	-0.384208
VWA2	-1.66897	0.376631	-3.84164	0.00043507	0.00379983	-0.398948
SAMD9	1.57015	2.82758	3.83776	0.000440091	0.00383396	-0.409846
GRIN2D	1.56555	1.24465	3.83627	0.000442024	0.00384109	-0.414009
RUNDC3B	1.47764	0.127428	3.83197	0.000447684	0.00388049	-0.42609
PKDCC	1.39708	3.36156	3.83133	0.00044852	0.00388328	-0.427863
CENPE	1.93057	1.43821	3.8313	0.000448569	0.00388328	-0.427966
SCRG1	1.37983	9.60356	3.82968	0.000450718	0.00389943	-0.432504
LAMB3	1.35027	2.8658	3.82661	0.00045482	0.00392999	-0.441107
RXFP4	-2.04274	0.895606	-3.82623	0.000455328	0.00393191	-0.442166
TNFSF11	2.48843	3.18099	3.82312	0.00045952	0.00395819	-0.450868
GNG11	1.34235	4.23083	3.82247	0.000460403	0.00396332	-0.452691
ARRDC3	-1.40275	7.41606	-3.82082	0.00046265	0.00398018	-0.457312
PPP1R14B	1.13181	2.80422	3.81824	0.000466191	0.00400065	-0.464551
SLC7A5P2	-1.14378	3.42556	-3.81308	0.000473335	0.0040569	-0.478985
PCOLCE	1.40192	7.39042	3.81017	0.000477406	0.00408417	-0.487112
FAT2	1.02235	1.19348	3.80634	0.000482828	0.00411916	-0.497831
GAL3ST4	1.89496	0.605364	3.80472	0.000485144	0.00412987	-0.502372
ANO1	1.05331	4.74562	3.80221	0.000488744	0.00415538	-0.509388
TBX5	-1.66114	3.94789	-3.80129	0.00049007	0.00416408	-0.511958
CD79B	-1.02293	3.0206	-3.79977	0.000492258	0.0041801	-0.516186
PHLDB3	-1.01089	2.74037	-3.79747	0.000495611	0.00420081	-0.522627
PIM1	-2.04654	2.75092	-3.79677	0.000496623	0.00420553	-0.524561
COL13A1	1.97395	2.42521	3.79667	0.000496779	0.00420553	-0.524858
PRCD	-1.26391	1.65397	-3.79504	0.000499169	0.00421541	-0.529413
SYNE3	-1.16683	4.51868	-3.79307	0.000502059	0.00423463	-0.534891
C4BPA	2.36242	1.30847	3.7927	0.000502618	0.00423674	-0.535944
KPNA2	1.37063	2.03748	3.79146	0.000504453	0.00424962	-0.539403
EPN2-IT1	-1.55638	1.18662	-3.78969	0.000507076	0.00426509	-0.544322
GUCY2C	1.2538	1.51393	3.78878	0.000508439	0.00427015	-0.546869
OTUD1	-1.51662	3.92013	-3.7766	0.000526976	0.00438735	-0.580832
ABCA1	-1.60988	5.48548	-3.77612	0.00052772	0.00438928	-0.58217
SMTN	-1.03583	5.8556	-3.77163	0.000534716	0.00443046	-0.594658
ZFP69	1.44651	1.60103	3.7715	0.000534921	0.00443046	-0.595022
C9orf173	-1.54756	0.042107	-3.76712	0.000541844	0.00448241	-0.607213
TSLP	-1.0056	2.17235	-3.75687	0.000558382	0.00459715	-0.635714
NCEH1	1.0187	2.13554	3.74636	0.000575846	0.00471838	-0.664901
FIBIN	1.08442	8.48629	3.74515	0.000577894	0.00473235	-0.668265
PABPC4L	1.11595	1.371	3.74433	0.000579287	0.00473812	-0.670545
GPC4	2.25513	0.703194	3.7434	0.000580862	0.00474819	-0.673119
FBN2	2.05551	1.26787	3.74212	0.000583047	0.0047604	-0.676676
LRRC8B	1.04146	1.62198	3.7362	0.000593231	0.00483496	-0.693082
ZNF681	1.42049	1.85643	3.73565	0.000594182	0.00483984	-0.694599
C1orf226	-1.24717	1.56513	-3.731	0.00060233	0.00489176	-0.707501
LIF	-2.71266	1.17588	-3.72764	0.000608272	0.0049371	-0.716798
CDC20	1.68478	0.139463	3.724	0.000614773	0.00497814	-0.726867
ADCYAP1R1	-1.72539	0.684756	-3.71844	0.000624839	0.00504643	-0.742247
NCKAP1L	-1.24635	2.05915	-3.7169	0.000627662	0.00506466	-0.746514
EFNA3	-1.52908	0.512228	-3.71585	0.000629594	0.00507728	-0.749425
ARHGAP18	1.22717	1.73321	3.71383	0.000633309	0.00509994	-0.754996
PNMAL1	1.31398	2.40078	3.71372	0.000633514	0.00509994	-0.755302
GNG2	1.1606	3.91748	3.71083	0.000638875	0.00513992	-0.763279
2023-03-03	-1.28616	3.53053	-3.7089	0.0006425	0.00516022	-0.768637
TNFRSF10D	-1.40445	5.05959	-3.7083	0.000643611	0.00516613	-0.770272
HOXA11-AS	-1.22466	2.58074	-3.70307	0.000653505	0.00522425	-0.784713
MED16	-1.00204	3.96418	-3.69803	0.000663186	0.00528325	-0.798631
PDK4	-2.04065	5.3577	-3.69085	0.000677214	0.00537946	-0.818439
C9orf142	1.39158	1.89534	3.68599	0.000686864	0.00543731	-0.831827
REP15	1.59438	0.874554	3.68366	0.000691539	0.00546177	-0.838244
SCD5	1.52012	0.903816	3.67974	0.000699463	0.0054968	-0.849022
FAM13A	-1.16327	6.25443	-3.67969	0.000699564	0.0054968	-0.849159
DCLK1	2.73706	0.624586	3.67131	0.000716817	0.00561955	-0.872201
LOC644656	-1.50372	1.87015	-3.66741	0.000724993	0.00566547	-0.882927
SLC15A2	1.15446	1.95168	3.66692	0.000726016	0.00566909	-0.88426
DKFZp686O1327	1.64063	1.45743	3.66541	0.000729212	0.00569083	-0.888414
DNAH5	1.07504	2.94279	3.66139	0.000737785	0.00574472	-0.899466
RTN4RL1	1.11062	4.17319	3.65785	0.000745412	0.00579428	-0.909189
PDLIM1	2.69068	0.594403	3.65679	0.000747708	0.00580559	-0.912097
ARID5B	-1.20132	6.48253	-3.65521	0.000751143	0.00582569	-0.916429
GCH1	-1.45752	4.24246	-3.65396	0.000753868	0.00583697	-0.919852
LRP1B	-1.65538	2.53298	-3.65334	0.000755219	0.00584415	-0.921545
MLLT10P1	1.56942	1.28458	3.65298	0.000756021	0.00584457	-0.922548
RCAN1	1.44333	6.5377	3.65293	0.000756122	0.00584457	-0.922674
PARD3	-1.07394	5.12583	-3.65255	0.000756944	0.00584458	-0.923702
ZNF81	1.42471	2.6667	3.6521	0.000757948	0.00584884	-0.924954
TMEM196	2.02575	1.16421	3.6494	0.000763898	0.00588488	-0.932346
CHD5	-1.77792	2.21604	-3.64726	0.000768667	0.00591437	-0.938228
VGLL3	2.50397	0.10196	3.64492	0.00077389	0.00592871	-0.944628
JUND	-1.41302	7.57924	-3.64329	0.000777556	0.00594358	-0.949093
CYP4F22	-1.99191	0.493458	-3.64072	0.000783358	0.00597653	-0.956119
SGCD	1.1447	6.02536	3.63744	0.000790839	0.00602174	-0.9651
NECAB3	-1.10886	2.79194	-3.6369	0.00079209	0.00602793	-0.966593
TIAM1	1.11182	3.05794	3.63587	0.000794458	0.00604261	-0.969414
ANO8	1.18858	2.4703	3.63439	0.000797871	0.00606189	-0.973464
OTUB2	-1.28983	3.04757	-3.63203	0.000803323	0.00609483	-0.979898
CHSY3	1.29658	4.31494	3.63025	0.000807477	0.00612137	-0.98477
TMEM189	1.31588	2.64351	3.62965	0.000808885	0.00612652	-0.986416
PPME1	-1.24904	4.42438	-3.62958	0.000809046	0.00612652	-0.986603
SERPINA10	-1.73272	2.87986	-3.62588	0.000817748	0.00618562	-0.99671
MRS2P2	-1.65902	2.39211	-3.62417	0.000821813	0.00620615	-1.00139
CHST2	1.50455	2.16749	3.6224	0.000826025	0.00621994	-1.00622
TPST2	1.11354	1.81807	3.62227	0.000826347	0.00621994	-1.00659
ZNF749	1.42185	0.991897	3.61915	0.000833823	0.00625571	-1.0151
HLA-DRB1	2.88756	0.783194	3.61676	0.000839613	0.00628205	-1.02163
MGAT3	1.21813	1.47277	3.61499	0.000843913	0.00630396	-1.02645
AGPS	1.14045	4.55641	3.60941	0.000857627	0.00638239	-1.04167
CDK2AP1	1.02899	7.02172	3.6091	0.000858381	0.00638239	-1.0425
CRABP2	1.92515	0.127372	3.60533	0.000867788	0.00642927	-1.05279
SYT13	2.44686	2.23009	3.60503	0.000868547	0.00642927	-1.05362
EVI5L	1.07116	2.35252	3.60256	0.000874752	0.00646506	-1.06034
TRAPPC1	1.84898	3.19437	3.59366	0.000897495	0.00659695	-1.08456
RNU12	-2.99875	1.19029	-3.59319	0.000898723	0.00660245	-1.08585
CSMD2	1.00458	5.3451	3.58586	0.000917891	0.00671464	-1.10577
FLJ38576	-1.55393	0.383615	-3.58506	0.000920006	0.00672297	-1.10794
CTPS1	1.46547	2.41611	3.58436	0.000921861	0.00673296	-1.10984
STXBP6	1.45004	0.0894214	3.58399	0.000922848	0.0067366	-1.11085
TDRKH	1.01912	0.841647	3.5821	0.000927879	0.00676615	-1.11598
SERTAD4	1.38112	5.67143	3.58004	0.000933399	0.00679432	-1.12157
PSRC1	-1.11019	2.59617	-3.57991	0.000933763	0.00679432	-1.12194
DNER	1.85944	4.4951	3.57849	0.000937581	0.00680942	-1.12579
CAPZB	1.04728	6.00149	3.57401	0.000949734	0.00688183	-1.13794
MSL3P1	1.7998	0.732404	3.57027	0.000960002	0.00692135	-1.14808
DLGAP1	-1.40785	1.4491	-3.5702	0.00096021	0.00692135	-1.14828
ECE2	1.61628	0.178417	3.56855	0.000964762	0.00694689	-1.15274
PIF1	1.07808	0.92474	3.56794	0.000966472	0.00695194	-1.15441
C12orf57	-1.07183	5.79154	-3.5654	0.000973541	0.00699184	-1.16129
STRA6	-1.42593	1.46773	-3.56457	0.000975868	0.0070049	-1.16354
TIPARP-AS1	-1.14062	2.93701	-3.5638	0.000978023	0.00701307	-1.16562
FAM198B	1.45828	3.57259	3.56337	0.00097923	0.00701807	-1.16678
ECM2	1.09705	7.6451	3.56134	0.000984969	0.00704821	-1.17229
JHDM1D	-1.00872	6.45383	-3.56061	0.000987042	0.00705937	-1.17427
ADAMTSL2	-1.69939	6.13248	-3.55481	0.00100361	0.0071593	-1.18996
FBXO45	1.45119	2.58184	3.55359	0.00100714	0.00717702	-1.19327
LTBP1	1.23226	7.31806	3.55217	0.00101125	0.00719519	-1.19712
FLJ37201	1.65642	0.350012	3.55195	0.0010119	0.00719605	-1.19771
ABCB1	-1.62319	0.58313	-3.54832	0.00102247	0.00725801	-1.20751
CAP2	1.56237	0.700854	3.54453	0.00103364	0.00732482	-1.21775
PTN	1.41272	3.43571	3.54052	0.00104559	0.00740512	-1.22859
CD3EAP	1.11244	0.990164	3.53907	0.00104994	0.00743169	-1.2325
CRYGS	1.16121	1.25051	3.53873	0.00105096	0.00743169	-1.23341
LZTS2	-1.42776	4.69734	-3.53766	0.00105421	0.00744322	-1.23632
HECW2	1.94055	0.337687	3.53598	0.00105928	0.00745987	-1.24084
CAMK2N1	1.26654	2.52151	3.53342	0.00106707	0.00750323	-1.24774
LOC440028	-1.27078	0.461201	-3.53278	0.00106902	0.00751315	-1.24947
VWC2	1.21599	1.58584	3.52788	0.00108415	0.00760146	-1.2627
SPP1	2.59015	5.41796	3.52558	0.0010913	0.00763081	-1.26889
CYP26B1	-1.08481	6.39027	-3.52398	0.00109631	0.00765027	-1.2732
CA12	2.65273	0.603843	3.52331	0.0010984	0.00766098	-1.275
TGM2	1.31754	5.15153	3.52235	0.00110143	0.00767318	-1.27759
CDH11	2.13533	3.58094	3.52074	0.00110651	0.00769421	-1.28193
ODF3	-1.54058	0.0664607	-3.51916	0.0011115	0.00772503	-1.28617
LPHN1	1.17862	3.70106	3.51347	0.00112974	0.00783683	-1.30149
TMEM14A	1.21023	3.85127	3.51218	0.00113391	0.00784518	-1.30496
ZMIZ1	-1.01557	8.02959	-3.51155	0.00113595	0.0078514	-1.30665
FAM20A	1.42772	2.55236	3.51018	0.00114042	0.00787269	-1.31035
COL15A1	1.26941	8.52588	3.51008	0.00114075	0.00787269	-1.31062
ZNF284	1.5717	1.3622	3.50747	0.00114927	0.00791959	-1.31762
SLC23A3	1.35518	0.713829	3.50705	0.00115065	0.00792124	-1.31876
ARVCF	1.03365	2.17546	3.50381	0.00116135	0.00797891	-1.32746
PTK6	-1.02716	2.21606	-3.50163	0.00116859	0.00801268	-1.33331
XAB2	-1.10505	3.80845	-3.4966	0.00118545	0.00810537	-1.3468
NFKBIE	-1.12432	1.2301	-3.49445	0.00119276	0.0081477	-1.35258
KBTBD12	-1.01778	2.46436	-3.49438	0.00119301	0.0081477	-1.35278
CD37	-1.69632	1.07519	-3.49161	0.00120247	0.00820009	-1.3602
LIME1	1.45047	0.56516	3.48512	0.0012249	0.00830786	-1.37759
RHOBTB3	-1.17041	7.6777	-3.4819	0.00123616	0.00836535	-1.3862
LINC00092	-1.62094	0.460108	-3.48183	0.00123641	0.00836535	-1.38639
HSPA8	1.0959	7.54974	3.47977	0.00124369	0.00840221	-1.39191
MAFK	-1.30752	4.18704	-3.47952	0.00124458	0.0084041	-1.39258
B3GNT8	-1.33451	0.398222	-3.47499	0.00126071	0.00850056	-1.4047
MAP3K9	-1.08505	1.11222	-3.47267	0.00126904	0.00854752	-1.41089
NTNG2	1.46125	0.316767	3.47254	0.00126954	0.00854752	-1.41126
LOC100126784	-1.1079	2.49411	-3.47191	0.0012718	0.00855439	-1.41293
ATRNL1	1.73531	3.09788	3.46904	0.00128223	0.00860869	-1.42061
LOC729970	-1.00922	1.39215	-3.469	0.00128237	0.00860869	-1.42071
RYR3	1.43843	1.25523	3.46653	0.00129139	0.00866499	-1.4273
SYCP2L	-1.224	1.5581	-3.46394	0.00130092	0.00871622	-1.43421
LIPC	1.49881	0.242883	3.46301	0.00130439	0.00873098	-1.43672
GPR88	1.38229	4.86024	3.46278	0.00130524	0.00873244	-1.43733
LOC541471	1.46029	0.77934	3.46031	0.00131442	0.00878106	-1.44392
SYCE2	-1.46563	0.0761009	-3.45985	0.00131614	0.00878829	-1.44515
PPP1R15B	-1.47463	5.99803	-3.45547	0.00133259	0.00888767	-1.45682
OSTC	1.0455	4.69963	3.45537	0.00133296	0.00888767	-1.45708
LOC91450	-1.08955	0.231867	-3.45482	0.00133506	0.00889626	-1.45856
PTTG1	1.23096	0.903686	3.45437	0.00133675	0.00890007	-1.45975
TUBA1B	1.20481	6.92319	3.45085	0.00135017	0.00896188	-1.46913
CCDC28A	-1.08559	3.34706	-3.44856	0.00135895	0.00900001	-1.47522
SYT8	2.02928	1.36195	3.44633	0.00136759	0.00903504	-1.48118
PLAU	2.5342	0.362497	3.44601	0.00136883	0.00903504	-1.48203
SPRED3	1.40999	1.2977	3.44507	0.00137249	0.00905486	-1.48454
PLD4	-1.59329	0.712608	-3.4413	0.00138719	0.00914752	-1.49455
ACVR2B-AS1	-1.02403	1.79518	-3.44065	0.00138978	0.00915582	-1.4963
NFAM1	1.45689	0.542643	3.43672	0.00140531	0.00924085	-1.50674
POU2F3	-1.37207	0.812295	-3.43174	0.00142527	0.00934942	-1.51999
HSPA4L	-1.30934	3.4688	-3.43008	0.001432	0.00938458	-1.5244
POU2F2	1.2596	0.415966	3.42652	0.00144647	0.00946591	-1.53384
IFI30	1.49077	1.89693	3.4246	0.00145434	0.00951292	-1.53894
INADL	-1.21905	6.25174	-3.41537	0.00149278	0.00970451	-1.56343
LSAMP	1.67386	1.26211	3.41476	0.00149532	0.00971641	-1.56502
ARHGAP10	-1.11236	5.32126	-3.41444	0.00149669	0.00972074	-1.56589
HSD3BP4	1.5056	0.42403	3.41169	0.00150833	0.00978712	-1.57316
PEG10	-1.34105	1.95298	-3.4084	0.0015224	0.00986448	-1.58187
CDC25A	1.47608	0.345553	3.4076	0.00152587	0.00988233	-1.58401
CLIC3	1.73672	0.48778	3.407	0.00152845	0.00989433	-1.58559
SOGA2	1.11054	1.60136	3.40667	0.00152987	0.00989891	-1.58646
IGFBP4	1.57473	5.48323	3.40266	0.00154727	0.00998802	-1.59707
LOC100129722	-1.45796	1.48057	-3.40076	0.00155557	0.0100331	-1.60209
F5	1.22341	6.04685	3.40073	0.0015557	0.0100331	-1.60217
RGS6	-1.40624	1.36397	-3.39297	0.0015901	0.0102358	-1.62268
COL9A1	1.75444	5.13917	3.38941	0.00160611	0.0103195	-1.63208
PCDH18	1.98972	2.03631	3.38797	0.00161262	0.0103517	-1.63587
EDA2R	1.34727	1.46	3.38559	0.00162347	0.0103972	-1.64216
SCNN1A	-1.5395	3.76755	-3.3852	0.00162523	0.0103988	-1.64317
CLEC3B	2.22681	3.07449	3.38279	0.0016363	0.0104502	-1.64954
PTP4A3	-1.13825	0.678411	-3.38227	0.00163869	0.0104509	-1.65091
CCDC129	1.93609	4.09346	3.37854	0.00165599	0.0105466	-1.66075
CXCL14	2.89325	2.39286	3.3783	0.00165711	0.0105476	-1.66138
LOC554223	-1.27357	0.448076	-3.37614	0.00166717	0.0105787	-1.66706
HAGHL	1.31494	1.16563	3.37524	0.00167141	0.0105959	-1.66944
KIF15	1.2438	0.320027	3.37447	0.00167503	0.0106099	-1.67147
LRRC9	1.62725	0.152939	3.37392	0.00167762	0.0106108	-1.67292
CAHM	-1.43331	0.533593	-3.37371	0.0016786	0.0106121	-1.67346
SSC5D	1.60684	5.027	3.37141	0.00168946	0.0106661	-1.67951
GRIK5	-1.38275	1.18325	-3.36889	0.00170148	0.0107272	-1.68615
LOC100129794	-1.08212	2.23265	-3.36726	0.00170926	0.0107615	-1.69042
MIR497HG	1.01487	3.50954	3.3661	0.00171484	0.0107868	-1.69348
HSD17B3	-1.15552	0.0786768	-3.36089	0.0017401	0.0109109	-1.70718
HIST1H1E	-2.16767	5.29253	-3.35774	0.00175555	0.0109878	-1.71546
TMTC4	1.349	0.937308	3.35606	0.0017638	0.0110294	-1.71985
ASPN	2.06719	8.02474	3.35502	0.00176899	0.0110518	-1.7226
BCDIN3D-AS1	1.18268	0.92973	3.35406	0.00177375	0.0110715	-1.72512
LPAR4	1.17421	3.29473	3.34972	0.00179544	0.0111816	-1.7365
SNX33	-1.41457	5.15929	-3.34796	0.00180431	0.0112216	-1.74112
DDTL	-1.0658	0.898636	-3.34764	0.00180594	0.0112266	-1.74196
ABCC3	1.71519	1.02382	3.34721	0.00180808	0.0112302	-1.74307
GRIP2	1.45178	1.54033	3.34686	0.00180987	0.0112358	-1.744
FGF14	1.10775	2.52096	3.3446	0.00182132	0.0112968	-1.7499
AQP3	1.35733	4.8465	3.34239	0.00183265	0.0113467	-1.75571
CTAGE7P	1.43634	0.651341	3.3416	0.00183668	0.0113591	-1.75777
ZGLP1	1.46065	0.00196236	3.33442	0.00187394	0.01154	-1.77656
SLC25A28	-1.0746	4.25115	-3.33404	0.00187591	0.0115427	-1.77755
SLC16A9	-1.15465	2.14007	-3.33103	0.00189177	0.0116032	-1.78543
FRMPD4	1.43386	1.86998	3.32998	0.00189734	0.0116322	-1.78818
TSPAN17	1.57431	1.80592	3.32697	0.00191335	0.0117146	-1.79604
RAMP1	-1.40449	2.61066	-3.32671	0.00191472	0.0117146	-1.79671
MRPL23-AS1	-1.57487	0.295526	-3.32666	0.00191504	0.0117146	-1.79687
PODNL1	1.29561	5.55586	3.32627	0.00191712	0.0117167	-1.79788
SPTLC3	1.05241	2.67471	3.32612	0.00191792	0.0117167	-1.79828
SOCS3	-1.53173	6.59352	-3.32422	0.00192809	0.0117476	-1.80323
HYDIN2	1.70547	0.00835121	3.32343	0.00193235	0.0117683	-1.80529
ERN1	-1.34746	3.8232	-3.32223	0.00193882	0.0117892	-1.80841
DKK1	2.02535	1.68679	3.32216	0.00193921	0.0117892	-1.8086
TAS2R14	1.18648	1.76553	3.31928	0.00195486	0.0118739	-1.81612
NINJ1	-1.11944	5.669	-3.31887	0.00195707	0.0118821	-1.81718
SAMD12	-1.71074	1.55917	-3.3105	0.00200331	0.0121307	-1.83902
MARCKS	1.98481	2.7406	3.30924	0.00201033	0.0121626	-1.84229
AATK	-1.10966	0.852866	-3.3089	0.00201227	0.012169	-1.84319
EID2B	-1.27382	1.89485	-3.30481	0.00203532	0.0122868	-1.85384
ZBTB16	-1.33734	5.94467	-3.30445	0.00203735	0.0122937	-1.85478
TMEM206	1.16833	1.18492	3.30026	0.00206125	0.012417	-1.86568
SDHAP2	-1.00805	3.32687	-3.29973	0.00206426	0.0124288	-1.86704
FOXC2	-1.96884	3.73373	-3.29944	0.00206592	0.0124334	-1.8678
SRGN	1.67749	5.94483	3.29461	0.00209386	0.0125851	-1.88035
BTG1	-1.13876	8.30347	-3.29385	0.00209833	0.0126064	-1.88234
LINC00441	-1.40667	0.287289	-3.29356	0.00210001	0.012611	-1.88309
HIST1H1C	-1.75955	5.98532	-3.29299	0.00210334	0.0126256	-1.88457
FADS2	1.0013	4.69199	3.28659	0.00214107	0.012813	-1.90119
LYG1	1.03016	1.22902	3.28288	0.00216323	0.0129175	-1.91081
HMGB3	1.09673	0.962949	3.27841	0.00219025	0.0130569	-1.9224
CXCR7	-1.05778	7.17472	-3.27808	0.00219225	0.0130569	-1.92325
SCN4A	-1.49978	0.301133	-3.27527	0.0022094	0.0131476	-1.93053
SELL	1.18931	0.531938	3.27391	0.00221776	0.0131803	-1.93406
XXYLT1	1.35451	2.57726	3.27066	0.00223782	0.0132824	-1.94247
LOC100506385	1.38624	1.00882	3.27016	0.0022409	0.0132892	-1.94375
ISM2	1.8817	0.330601	3.2684	0.00225189	0.0133314	-1.94832
LOC401074	-1.11435	0.78663	-3.2668	0.00226188	0.0133734	-1.95246
SLC25A29	-1.90617	1.66885	-3.26654	0.00226349	0.0133742	-1.95312
PDE3B	-1.15922	4.81771	-3.26418	0.00227833	0.013436	-1.95922
LINC00115	-1.11242	1.55624	-3.2639	0.00228011	0.0134408	-1.95995
RP2	1.07473	2.80369	3.26079	0.0022998	0.0135279	-1.96798
MSX1	1.52092	0.34297	3.25383	0.00234451	0.0137264	-1.98595
RLIM	-1.0449	7.05757	-3.24798	0.00238278	0.0139209	-2.00105
EPS8	-1.05027	7.26922	-3.2469	0.00238991	0.0139567	-2.00384
SSTR5	-1.00892	3.9503	-3.24582	0.002397	0.0139803	-2.00661
GYLTL1B	-1.05325	0.0662576	-3.24364	0.00241151	0.0140471	-2.01224
HIST2H2AC	-1.58003	4.53922	-3.24285	0.00241675	0.0140717	-2.01426
KAL1	1.37141	7.06597	3.24154	0.00242549	0.0141072	-2.01763
MAFB	1.55333	4.44252	3.23922	0.0024411	0.0141656	-2.02361
TBX3	-1.09529	1.97718	-3.23625	0.0024612	0.0142462	-2.03126
MARS2	1.32736	0.524908	3.23265	0.00248575	0.0143702	-2.04051
LYZ	1.98913	0.481165	3.23192	0.00249071	0.0143884	-2.04237
GPM6B	-1.06246	5.14825	-3.23188	0.00249098	0.0143884	-2.04248
PUS1	1.03672	2.34337	3.22919	0.00250953	0.0144713	-2.04939
GAS2L1	1.03622	2.97124	3.22853	0.00251414	0.0144797	-2.0511
LINC00574	1.1432	1.77363	3.22078	0.00256836	0.0147611	-2.07099
NUDT6	1.31371	0.333356	3.21788	0.00258893	0.0148546	-2.07843
ARHGAP11A	1.52401	1.69435	3.21478	0.00261107	0.0149611	-2.08636
DPP4	1.36916	3.27695	3.21265	0.00262642	0.0150258	-2.09182
SLC51B	-1.41427	1.44474	-3.21111	0.00263759	0.0150835	-2.09578
FAIM2	1.04228	1.37917	3.2101	0.00264494	0.0151068	-2.09837
ZNF367	1.13505	0.858177	3.20673	0.0026695	0.0152029	-2.10698
DPH3P1	-1.40573	0.982988	-3.20164	0.00270709	0.0153915	-2.12
VCAM1	1.59718	7.25282	3.19976	0.00272107	0.0154519	-2.1248
LECT1	1.77587	6.10491	3.19932	0.00272436	0.0154642	-2.12593
TRIB3	-1.33234	1.31008	-3.19908	0.00272616	0.0154681	-2.12654
PNP	-1.16577	4.37422	-3.1962	0.00274784	0.0155654	-2.13392
SH3BP5	-1.28452	3.94448	-3.19317	0.00277074	0.015663	-2.14165
MATN1	-1.46151	0.253396	-3.19164	0.00278236	0.0157222	-2.14554
COL6A3	1.36862	9.82498	3.18821	0.00280868	0.0158255	-2.1543
RNF157	-1.04293	1.33724	-3.18667	0.00282053	0.0158663	-2.15822
CCNF	1.18093	0.833431	3.1855	0.0028296	0.0158914	-2.16121
TACSTD2	1.72744	0.228199	3.1839	0.00284204	0.0159483	-2.1653
ANGPTL7	-1.44748	4.7129	-3.18141	0.00286141	0.0160309	-2.17162
LOC254100	-1.33183	0.000483196	-3.18101	0.00286458	0.0160421	-2.17265
SELP	1.21608	2.17784	3.17847	0.00288454	0.0161081	-2.17911
HOXC5	1.12993	0.600212	3.17748	0.00289237	0.0161322	-2.18163
GPER	-1.04361	4.51123	-3.17674	0.00289825	0.016156	-2.18352
KIAA2022	-1.17517	1.7222	-3.17665	0.00289898	0.016156	-2.18375
MACC1	1.57025	0.704052	3.1726	0.00293127	0.0163161	-2.19406
DNAJC22	1.44491	0.294794	3.1718	0.00293764	0.0163384	-2.19608
LINC00654	1.33801	1.28915	3.16384	0.00300224	0.0166106	-2.21631
ANKRD50	1.03816	5.75285	3.16342	0.00300571	0.016623	-2.21738
YPEL2	-1.10002	5.70788	-3.15744	0.00305517	0.0168763	-2.23256
NOTCH4	-1.03944	1.68126	-3.15138	0.00310599	0.0171329	-2.2479
DDX28	1.29772	1.58814	3.14764	0.00313788	0.017264	-2.25739
KIAA1045	-1.42443	0.0720822	-3.14731	0.00314067	0.0172724	-2.25821
GGH	1.06255	2.8437	3.14713	0.00314221	0.017274	-2.25867
MT1G	2.15466	4.73488	3.13846	0.00321722	0.0176371	-2.28059
FGF1	1.52992	6.11093	3.13143	0.00327933	0.0178851	-2.29835
SMG7-AS1	-1.3901	0.610352	-3.12584	0.00332945	0.0181355	-2.31243
SALL4	-1.21832	0.457334	-3.12257	0.00335913	0.0182481	-2.32067
LOC400752	-1.32986	0.166093	-3.12003	0.00338241	0.0183385	-2.32708
DAGLA	1.22652	0.929523	3.10882	0.0034867	0.0188077	-2.35527
ALX4	1.38572	1.24079	3.10182	0.00355342	0.0191003	-2.37285
CCBP2	1.17556	2.86425	3.09973	0.00357357	0.0191632	-2.37809
CYTL1	-1.79218	10.1854	-3.09854	0.00358515	0.019196	-2.38109
GPC5	1.26266	3.79491	3.09731	0.00359708	0.0192455	-2.38417
FGFR4	-1.04493	0.592334	-3.09706	0.00359953	0.0192505	-2.3848
REM2	-1.32222	0.417392	-3.09372	0.00363215	0.0193724	-2.39317
LOC154761	-1.11404	0.246131	-3.08935	0.00367526	0.0195569	-2.40411
ZKSCAN1	-1.25085	7.16017	-3.08799	0.00368872	0.0195967	-2.4075
NEURL2	-1.04091	0.715086	-3.08673	0.00370136	0.0196201	-2.41067
ARHGAP28	1.29156	2.45832	3.08431	0.00372555	0.0196952	-2.41671
CXXC5	-1.05443	4.37657	-3.08298	0.00373903	0.0197287	-2.42005
LOC401397	1.49168	1.88836	3.08173	0.0037516	0.0197875	-2.42317
NREP	1.19697	4.72098	3.08051	0.00376401	0.0198453	-2.42622
IFIT1	1.35291	3.53969	3.0796	0.00377321	0.0198786	-2.42849
HIST2H2AB	-1.88789	2.21622	-3.07728	0.00379689	0.0199626	-2.43428
SLC2A4	-1.21543	0.949219	-3.07644	0.0038055	0.0199876	-2.43638
CRIP1	1.89359	5.94443	3.07536	0.00381657	0.0200242	-2.43907
SBDS	-1.2783	5.57099	-3.07491	0.00382118	0.0200242	-2.44019
TSC22D3	-1.42978	7.97299	-3.07141	0.00385744	0.0201758	-2.44894
MTRNR2L8	-1.27053	0.612601	-3.07121	0.00385955	0.0201792	-2.44945
UROC1	1.26178	2.06989	3.06836	0.00388927	0.0203037	-2.45655
SH3TC2	1.33199	0.998285	3.06799	0.00389313	0.0203085	-2.45747
DUSP15	-1.00266	0.188537	-3.06675	0.00390616	0.0203534	-2.46056
LDHAL6A	1.23919	0.36595	3.06386	0.00393659	0.020469	-2.46775
SPAG6	1.19504	1.37099	3.06192	0.00395721	0.0205542	-2.47259
OPRL1	1.25233	0.0955055	3.06146	0.00396206	0.0205636	-2.47372
GPR56	1.66338	1.41387	3.05642	0.00401612	0.0207902	-2.48627
HEY2	1.28787	1.22901	3.05008	0.00408508	0.0210312	-2.50203
TMEM176B	2.40284	0.812891	3.04325	0.00416063	0.0213564	-2.51898
USH1C	1.43882	1.42291	3.04113	0.00418435	0.0214701	-2.52424
CCDC19	-1.01796	0.73008	-3.04045	0.00419193	0.0214959	-2.52591
CAPN12	-1.22372	0.392949	-3.03562	0.00424657	0.021721	-2.53789
LOC100499183	1.17537	1.60175	3.03188	0.00428929	0.0218863	-2.54715
IGFLR1	-1.18201	0.801877	-3.02465	0.00437312	0.0222352	-2.56504
PDE2A	-1.77619	1.06529	-3.02413	0.00437917	0.0222461	-2.56632
PHC2	-1.00861	5.64082	-3.022	0.00440413	0.0223154	-2.57157
CYP4F11	-1.95123	0.700996	-3.02131	0.00441224	0.0223482	-2.57327
ZNF792	1.15617	2.23319	3.02044	0.00442258	0.0223841	-2.57544
REEP4	1.3739	1.48508	3.01981	0.00442997	0.0223969	-2.57698
CASZ1	-1.31367	0.420674	-3.01637	0.00447088	0.0225706	-2.58547
TMEM177	1.17241	0.0516532	3.01617	0.00447331	0.0225746	-2.58598
FST	-1.60912	1.8258	-3.00474	0.0046118	0.0231548	-2.61414
ESR2	-1.24663	0.199669	-3.00408	0.00461988	0.0231869	-2.61576
GPRIN3	1.53445	0.120833	3.00254	0.00463887	0.0232568	-2.61955
DUSP8	-1.59676	1.00733	-2.99737	0.0047032	0.0234637	-2.63226
PLA2G16	-1.02043	4.24168	-2.99596	0.00472082	0.0235222	-2.63571
SMLR1	1.87263	0.580672	2.99412	0.00474404	0.0236037	-2.64024
TMEM74B	1.18647	0.151982	2.99196	0.00477135	0.0237054	-2.64554
MMP2	1.40805	6.42433	2.98704	0.00483414	0.0239652	-2.65761
NCOR2	-1.03013	7.76984	-2.9857	0.00485137	0.024025	-2.66089
ADAMTS16	1.69537	0.147184	2.9853	0.00485655	0.024042	-2.66187
ACSS1	-1.48896	1.52781	-2.98427	0.00486993	0.0240996	-2.66441
SYNE2	-1.04673	6.52097	-2.97862	0.00494352	0.0243849	-2.67825
MIR155HG	-1.07551	1.37568	-2.97635	0.00497339	0.0244885	-2.6838
ZNF671	1.06509	0.360053	2.97498	0.00499142	0.0245597	-2.68714
SH3TC1	-1.57827	5.13418	-2.97395	0.00500512	0.0246112	-2.68967
DBIL5P	-1.01711	0.607265	-2.97392	0.00500545	0.0246112	-2.68973
DIRAS3	-1.03543	2.58485	-2.97241	0.00502556	0.0246924	-2.69343
ATP8B4	1.70509	1.15358	2.97051	0.00505094	0.024779	-2.69807
TPO	1.69649	0.412082	2.96888	0.00507288	0.0248629	-2.70207
MPZL3	1.45869	0.263292	2.96812	0.00508304	0.0249019	-2.70391
CBWD6	-1.47073	1.04499	-2.96222	0.00516308	0.0251707	-2.71831
XKR8	1.02465	3.54838	2.96158	0.00517187	0.0251868	-2.71988
FAM108C1	1.29737	1.68871	2.95555	0.00525501	0.0255646	-2.73458
HAVCR1P1	1.25351	0.679586	2.94809	0.00535958	0.0259908	-2.75273
PPFIA3	1.16814	0.397681	2.94701	0.00537493	0.026056	-2.75536
TMOD1	-1.48195	3.25844	-2.94635	0.00538435	0.0260844	-2.75697
NUDT1	1.07755	1.68981	2.9462	0.00538646	0.0260844	-2.75733
TAF9B	-1.3493	5.57109	-2.94323	0.00542885	0.0262528	-2.76455
PRKX	1.12883	0.789462	2.94227	0.00544261	0.0262734	-2.76688
DCXR	-1.3355	4.63081	-2.94055	0.00546729	0.0263646	-2.77105
ZBTB10	-1.12947	5.72964	-2.93908	0.00548856	0.0264395	-2.77462
LURAP1	-1.41553	2.53229	-2.93778	0.00550739	0.0265209	-2.77777
PCDH1	1.18936	1.4602	2.93704	0.00551815	0.0265634	-2.77957
ZNF169	1.12915	1.53496	2.9347	0.0055523	0.0266719	-2.78525
PRKXP1	1.52836	1.61483	2.93243	0.00558553	0.0268035	-2.79074
INHA	-1.32948	0.530025	-2.93222	0.00558869	0.0268094	-2.79126
ENPP2	1.01055	4.27113	2.9305	0.00561401	0.0269027	-2.79542
NID2	1.15631	4.14084	2.92751	0.00565839	0.0270496	-2.80267
FAM205A	-1.42423	0.19818	-2.92721	0.00566282	0.0270614	-2.80339
PLXNA4	1.5309	2.2138	2.92373	0.00571501	0.0272447	-2.81183
GPRASP2	-1.23804	1.3687	-2.92306	0.00572498	0.0272802	-2.81343
LOC100289361	-1.02645	0.21365	-2.92297	0.00572643	0.0272802	-2.81366
ABTB1	-1.03012	3.6059	-2.92236	0.00573563	0.0273146	-2.81514
COL25A1	1.59725	1.66669	2.91642	0.00582582	0.02762	-2.82949
KLLN	1.05142	0.0403524	2.91576	0.00583597	0.0276444	-2.83109
P2RX6	1.12398	0.450443	2.91569	0.00583699	0.0276444	-2.83125
SNORD50A	-1.49699	0.335896	-2.91071	0.00591373	0.0279407	-2.84326
IGSF10	1.32473	1.1705	2.90966	0.00593004	0.0279986	-2.84579
DYRK3	-1.10541	3.63573	-2.90198	0.00605078	0.0285051	-2.86432
GPRC5C	-1.24669	5.00821	-2.8996	0.00608864	0.028659	-2.87005
APLN	-1.1204	2.11829	-2.89778	0.00611759	0.028756	-2.8744
NME1	1.0653	3.88961	2.89638	0.00614011	0.028852	-2.87778
MOGAT1	-1.48851	0.94445	-2.89264	0.00620054	0.0290285	-2.88678
COL10A1	1.7401	4.64155	2.89187	0.00621301	0.0290716	-2.88862
USPL1	-1.0047	4.83562	-2.88999	0.00624365	0.0291596	-2.89314
COL18A1	1.01168	3.98671	2.88229	0.00637056	0.0296071	-2.91161
FAM212A	1.3109	0.232636	2.88089	0.00639391	0.0296703	-2.91497
CCL28	-1.73889	1.49815	-2.87868	0.00643088	0.0297997	-2.92026
TICAM1	-1.37269	2.35718	-2.87808	0.00644101	0.0298286	-2.92171
ACOX2	1.47976	0.160091	2.87791	0.00644385	0.0298318	-2.92211
SNORA31	-1.41209	0.331421	-2.87474	0.00649729	0.0300187	-2.92969
MTX1	-1.71122	1.19444	-2.87164	0.00655003	0.0301756	-2.93711
KCNQ3	1.77187	0.110708	2.87045	0.00657035	0.0302548	-2.93995
C21orf62	1.09965	1.47468	2.86988	0.00658015	0.0302797	-2.94132
MID1	1.34163	1.92632	2.86777	0.00661638	0.0304206	-2.94635
TRPM3	-1.50933	1.18209	-2.86356	0.00668932	0.0306883	-2.95641
UBE2QL1	1.7501	0.643293	2.86106	0.00673308	0.0308495	-2.96239
LOC100288069	-1.23728	0.101185	-2.85737	0.00679804	0.0310748	-2.97119
FRK	1.53571	2.74645	2.84254	0.00706484	0.0320816	-3.00647
SYNC	1.5208	0.442176	2.84095	0.00709401	0.0322034	-3.01024
SLC6A9	1.28732	2.60846	2.83732	0.0071612	0.0324581	-3.01888
DDIT4L	-1.47627	4.86331	-2.83615	0.0071828	0.0325422	-3.02164
TSHB	1.42796	0.922635	2.83399	0.00722309	0.0326603	-3.02676
PCDP1	1.10228	0.512098	2.8306	0.0072868	0.0328663	-3.0348
AP3S2	-1.43934	0.225132	-2.83055	0.00728772	0.0328663	-3.03491
BLID	2.37621	0.880346	2.82422	0.007408	0.0332788	-3.0499
LINC00152	1.07283	1.59762	2.81616	0.00756384	0.0337805	-3.06894
EHF	1.38929	1.14362	2.81469	0.00759278	0.0338982	-3.07244
CKB	-1.35396	5.14177	-2.81427	0.00760088	0.0339234	-3.07341
GAS6-AS1	-1.08874	0.291581	-2.81081	0.00766898	0.034125	-3.08157
RGS2	1.11905	3.63632	2.81012	0.00768272	0.0341669	-3.0832
IQGAP3	1.11222	2.20482	2.80393	0.00780624	0.0344826	-3.09779
CNR1	1.40218	0.378288	2.80206	0.00784397	0.0346381	-3.10219
NOS2	-1.36633	4.02297	-2.80005	0.00788467	0.0347733	-3.10692
MIR143HG	1.37048	0.767186	2.79947	0.00789652	0.0348048	-3.10829
KIF14	1.47385	0.106925	2.79945	0.00789687	0.0348048	-3.10834
CCDC96	-1.26294	0.908771	-2.79804	0.00792555	0.0348643	-3.11165
FBLIM1	1.13286	1.42575	2.79662	0.00795446	0.0349794	-3.11498
CRISPLD1	1.60238	7.81311	2.79424	0.00800347	0.0351398	-3.12059
ERBB3	-1.00156	1.32879	-2.79029	0.00808496	0.0354299	-3.12984
KIF1A	1.29532	1.37815	2.78679	0.00815805	0.0356481	-3.13806
SLC8A3	1.00454	1.65548	2.78621	0.00817014	0.0356784	-3.13941
CACNA1I	1.4061	0.984813	2.77971	0.00830766	0.0361757	-3.15465
RHBDL2	1.6663	0.239644	2.77704	0.0083647	0.0363323	-3.1609
CADM1	1.09781	3.16788	2.77105	0.00849408	0.0367783	-3.1749
PANX2	-1.39523	0.84601	-2.77045	0.00850702	0.0368228	-3.17629
PAPPA2	-1.05022	1.85402	-2.76904	0.00853794	0.036945	-3.1796
PTGER4	1.13332	1.89436	2.76688	0.0085851	0.0370909	-3.18463
GCSAM	1.74271	0.270253	2.76661	0.00859113	0.0370937	-3.18527
LAMB1	1.35246	3.59876	2.76158	0.0087023	0.0375032	-3.19699
NKX3-2	1.00795	4.75583	2.75904	0.00875895	0.0377119	-3.20291
MIR612	-2.48525	3.17196	-2.75748	0.00879398	0.0378391	-3.20655
LOC283143	1.19583	0.19346	2.75657	0.00881443	0.0379118	-3.20867
BOLA3	1.23771	1.95757	2.74568	0.00906265	0.0387411	-3.23398
NDC80	1.32913	0.173486	2.74321	0.00911993	0.0389093	-3.23972
GDF5	1.17172	4.36189	2.74191	0.00915031	0.0389829	-3.24275
SHISA3	-1.41756	2.23963	-2.74119	0.00916695	0.0390296	-3.2444
TMEM26	1.00608	2.50111	2.73865	0.00922643	0.039186	-3.25029
ATP5J2	1.27959	4.0176	2.73739	0.00925607	0.0392635	-3.25321
SNHG12	-1.06343	4.52083	-2.73613	0.00928588	0.0393658	-3.25614
TCEAL6	-1.1957	4.69914	-2.73258	0.00937004	0.0396561	-3.26435
LTB4R2	-1.10713	0.12293	-2.7289	0.009458	0.0398624	-3.27286
UBALD2	-1.01597	4.45102	-2.72846	0.00946862	0.0398882	-3.27388
FOXA3	-1.14973	2.64392	-2.72616	0.009524	0.0400549	-3.27919
A2M-AS1	1.15878	3.60523	2.72441	0.00956642	0.040172	-3.28323
LOC728024	-1.00009	1.51004	-2.72071	0.00965664	0.0405015	-3.29177
SRM	1.53386	4.71866	2.71709	0.00974568	0.0407877	-3.30012
LSM1	1.0047	4.43653	2.71698	0.00974857	0.0407877	-3.30039
RBPMS2	-1.14965	2.46084	-2.71425	0.00981616	0.0410083	-3.30667
LEPREL1	1.14185	4.00603	2.71333	0.00983918	0.0410431	-3.3088
KCNG1	1.19248	0.520562	2.71221	0.00986709	0.0411213	-3.31138
ITM2A	1.0018	6.54554	2.71112	0.0098944	0.0411843	-3.31389
PTPRZ1	1.54649	0.201971	2.71089	0.00990006	0.0411843	-3.31441
CHML	1.39196	2.57365	2.70542	0.010038	0.041582	-3.32699
VGLL4	-1.29941	5.31363	-2.70338	0.01009	0.0417474	-3.33168
GRIN2C	1.28136	0.935532	2.70116	0.0101467	0.0419315	-3.33677
NRXN2	1.22312	0.942631	2.69908	0.0102003	0.0420902	-3.34157
KCNK2	1.98527	0.298874	2.69522	0.0103002	0.0424388	-3.35042
ZNF154	1.4753	0.487452	2.69215	0.0103802	0.0426286	-3.35744
FAM58A	1.02362	2.85162	2.68888	0.0104661	0.0429169	-3.36492
TFAP4	-1.08214	1.77225	-2.68632	0.010534	0.0431056	-3.3708
TC2N	-1.47062	1.41848	-2.6823	0.0106413	0.04348	-3.37999
CEBPD	-1.44006	7.4901	-2.67918	0.0107251	0.0437446	-3.38711
FN3K	-1.08504	1.75487	-2.67636	0.0108015	0.0439784	-3.39356
C17orf96	-1.41757	0.658322	-2.67452	0.0108514	0.0441065	-3.39773
ATP5G1	1.08441	3.39761	2.67449	0.0108522	0.0441065	-3.3978
NDP	1.00786	2.87402	2.6711	0.0109453	0.0444063	-3.40555
LOC113230	-1.11297	1.81059	-2.66831	0.0110223	0.0446659	-3.4119
CLEC3A	1.91369	8.40292	2.66453	0.0111274	0.0450299	-3.42051
GDF6	1.54499	3.39715	2.66425	0.011135	0.0450299	-3.42113
ITGB4	-1.14475	3.93926	-2.66424	0.0111353	0.0450299	-3.42116
BEND6	1.73315	1.57762	2.66179	0.0112039	0.0452688	-3.42672
DGKI	1.34077	2.32758	2.65986	0.0112585	0.0453911	-3.43113
ERCC6L	1.72103	0.358984	2.65667	0.0113486	0.0456529	-3.43835
TFPI	1.11197	2.63545	2.65306	0.0114517	0.0459868	-3.44654
H19	1.07557	11.159	2.65187	0.011486	0.0460845	-3.44926
EPSTI1	1.12456	0.404517	2.64994	0.0115414	0.0462529	-3.45361
ZNF280B	1.08701	0.382158	2.64957	0.0115522	0.0462825	-3.45446
CKMT2	1.42502	0.807975	2.64462	0.011696	0.0466689	-3.46566
C1orf87	-1.19588	0.293398	-2.63746	0.0119071	0.047354	-3.48185
ZMAT4	-1.50313	0.86652	-2.63611	0.0119473	0.0474518	-3.4849
BOC	-1.03742	6.71228	-2.63428	0.012002	0.047574	-3.48904
LOC100507244	1.43315	1.03901	2.62978	0.0121375	0.0479791	-3.49919
SLC30A2	-1.31112	0.188085	-2.62864	0.0121719	0.0480942	-3.50175
NDUFB2	1.16632	4.47267	2.62391	0.0123162	0.0485253	-3.51241
CACNA1H	-1.61088	1.65379	-2.62044	0.012423	0.0487791	-3.52022
CTTNBP2	-1.03305	6.08966	-2.61907	0.0124656	0.0489043	-3.52331
MT1L	1.27811	2.61124	2.61888	0.0124712	0.0489123	-3.52372
GINS4	1.0039	0.237244	2.61584	0.012566	0.0492422	-3.53056
AOAH	1.00078	0.44885	2.61301	0.0126546	0.0495049	-3.53691
