# Supplementary material for: Machine learning algorithm-based biomarker exploration and validation of mitochondria-related diagnostic genes in osteoarthritis
Source: PeerJ. 2024 Sep 10;12:e17963. doi: 10.7717/peerj.17963 (PMC11397131; doi:10.7717/peerj.17963)
Supplement: Supplemental Information 3 [file peerj-12-17963-s003.xlsx]

## Sheet: Sheet1
LASSO	SVM
MTFP1	MTFP1
GPT2	GRPEL1
GRPEL1
FAM210A
BNIP3L
ACADL
ALDH3A2
PLD6
UCP3
SLC25A29
